# Supplementary material for: Systematic assessment of prescribed medications and short-term risk of myocardial infarction – a pharmacopeia-wide association study from Norway and Sweden
Source: PubMed Central journal article supplement (PMC6547702; doi:10.1038/s41598-019-44641-1), 2019-06-04
Supplement: 41598_2019_44641_MOESM1_ESM.pdf [file 41598_2019_44641_MOESM1_ESM.pdf]

## Supplementary file

### **Title: Systematic assessment of prescribed medications and short-term risk of myocardial infarction – a pharmacoepia-wide association study from Norway and Sweden**

Abhijit Sen\*, PhD<sup>1,2</sup>, Ioannis Vardaxis, MSc<sup>3</sup>, Bo Henry Lindqvist, PhD<sup>3</sup>, Ben Michael Brumpton, PhD<sup>4,5,6</sup>, Linn Beate Strand, PhD<sup>1</sup>, Inger Johanne Bakken, PhD<sup>7</sup>, Lars Johan Vatten, MD, PhD<sup>1</sup>, Pål Richard Romundstad, PhD<sup>1</sup>, Rickard Ljung, MD PhD<sup>8</sup>, Kenneth Jay Mukamal, MD<sup>9</sup>, Imre Janszky, MD PhD<sup>1,10</sup>

#### **Affiliations**

<sup>1</sup>Department of Public health and Nursing, Faculty of Medicine and Health Sciences, Norwegian University of Science and Technology, 7491 Trondheim, Norway.

<sup>2</sup>Center for Oral Health Services and Research (TkMidt), Trondheim, Norway

<sup>3</sup>Department of Mathematical Sciences, Norwegian University of Science and Technology, 7491 Trondheim, Norway.

<sup>4</sup>Department of Thoracic Medicine, St. Olav's Hospital, Trondheim University Hospital, Trondheim, Norway.

<sup>5</sup>K.G. Jebsen Centre for Genetic Epidemiology, Department of Public Health and Nursing, Norwegian University of Science and Technology, 7491 Trondheim, Norway.

<sup>6</sup>MRC Integrative Epidemiology Unit, University of Bristol, UK.

<sup>7</sup>Centre for Fertility and Health (CeFH), Norwegian Institute of Public Health, Oslo, Norway.

<sup>8</sup>Unit of Epidemiology, Institute of Environmental Medicine, Karolinska Institutet, SE 171 77, Solna, Stockholm, Sweden.

<sup>9</sup>Department of Medicine, Beth Israel Deaconess Medical Center, Boston, MA, United States.

<sup>10</sup>Regional Center for Health Care Improvement, St Olav's Hospital, Trondheim, Norway

#### **\*Correspondence:**

**Abhijit Sen, PhD**

Email: abhijit.sen@ntnu.no

## Supplementary file

**Table S1** Relative risks of acute myocardial infarction within 7 days after the drug was dispensed. Univariable and BOLASSO results for drugs selected by BOLASSO approach in Norway.

**Table S2** Relative risks of acute myocardial infarction within 7 days after the drug was dispensed. Univariable and BOLASSO results for drugs selected by BOLASSO approach in Sweden.

**Table S3** Relative risks of acute myocardial infarction within 14 days after the drug was dispensed, selected by BOLASSO approach in both countries.

**Table S4** Relative risks of acute myocardial infarction within 7 days after the drug was dispensed, selected by BOLASSO approach in both countries. AMI diagnosed in hospital only.

**Table S5** Relative risks of acute myocardial infarction within 7 days after the drug was dispensed. Univariable results for drugs selected by BOLASSO approach in both the countries. Sub-group analyses according to age in Norway

**Table S6** Relative risks of acute myocardial infarction within 7 days after the drug was dispensed. Univariable results for drugs selected by BOLASSO approach in both the countries. Sub-group analyses according to age in Sweden

Supplementary file

| <b>Table S1. Relative risks of acute myocardial infarction within 7 days after the drug was dispensed<sup>a</sup>. Univariable and BOLASSO results for drugs selected by BOLASSO approach in Norway<sup>b</sup></b> |                        |                                                              |                     |                      |
|---------------------------------------------------------------------------------------------------------------------------------------------------------------------------------------------------------------------|------------------------|--------------------------------------------------------------|---------------------|----------------------|
| ATC <sup>d</sup>                                                                                                                                                                                                    | Drug Name              | Case window<br>(N exposed)<br>/Control window<br>(N exposed) | Univariable         | BOLASSO <sup>c</sup> |
|                                                                                                                                                                                                                     |                        |                                                              | RR (95% CI)         | RR (95% CI)          |
| A02BA02                                                                                                                                                                                                             | Ranitidine             | 239 / 143                                                    | 1.67 (1.36 to 2.06) | 1.76 (1.37 to 2.26)  |
| A02BC01                                                                                                                                                                                                             | Omeprazole             | 238 / 213                                                    | 1.12 (0.93 to 1.34) | 1.17 (0.94 to 1.45)  |
| A02BC02                                                                                                                                                                                                             | Pantoprazole           | 662 / 590                                                    | 1.12 (1.00 to 1.25) | 1.14 (1.00 to 1.31)  |
| A02BC05                                                                                                                                                                                                             | Esomeprazole           | 725 / 588                                                    | 1.23 (1.11 to 1.37) | 1.29 (1.13 to 1.48)  |
| A03FA01                                                                                                                                                                                                             | Metoclopramide         | 335 / 220                                                    | 1.52 (1.38 to 1.81) | 1.40 (1.12 to 1.75)  |
| A10BA02                                                                                                                                                                                                             | Metformin              | 693 / 695                                                    | 0.99 (0.90 to 1.11) | 0.95 (0.83 to 1.09)  |
| A10BB12                                                                                                                                                                                                             | Glimepiride            | 341 / 349                                                    | 0.98 (0.84 to 1.13) | 0.91 (0.76 to 1.09)  |
| A10BH01                                                                                                                                                                                                             | Sitagliptin            | 35 / 18                                                      | 1.94 (1.10 to 3.43) | 1.98 (0.99 to 3.98)  |
| A12CC30                                                                                                                                                                                                             | Magnesium              | 39 / 24                                                      | 1.63 (0.98 to 2.70) | 2.09 (0.94 to 4.62)  |
| B01AA03                                                                                                                                                                                                             | Warfarin               | 489 / 493                                                    | 0.99 (0.88 to 1.12) | 0.95 (0.83 to 1.09)  |
| B01AB05                                                                                                                                                                                                             | Enoxaparin             | 78 / 43                                                      | 1.81 (1.25 to 2.63) | 1.85 (1.14 to 3.00)  |
| B01AC04                                                                                                                                                                                                             | Clopidogrel            | 391 / 251                                                    | 1.56 (1.33 to 1.83) | 1.44 (1.19 to 1.76)  |
| B01AC06                                                                                                                                                                                                             | Acetylsalicylic acid   | 3141 / 2803                                                  | 1.12 (1.06 to 1.18) | 1.09 (1.02 to 1.17)  |
| B01AC24                                                                                                                                                                                                             | Ticagrelor             | 27 / 6                                                       | 4.50 (1.86 to 10.9) | 3.12 (1.27 to 7.67)  |
| B03BA03                                                                                                                                                                                                             | Hydroxocobalamin       | 49 / 63                                                      | 0.78 (0.54 to 1.13) | 0.66 (0.43 to 1.02)  |
| C01DA02                                                                                                                                                                                                             | Glycerol trinitrate    | 1758 / 864                                                   | 2.03 (1.88 to 2.21) | 2.15 (1.96 to 2.36)  |
| C01DA14                                                                                                                                                                                                             | Isosorbide mononitrate | 1072 / 955                                                   | 1.12 (1.03 to 1.22) | 1.00 (0.89 to 1.12)  |
| C03CA01                                                                                                                                                                                                             | Furosemide             | 1317 / 1201                                                  | 1.10 (1.01 to 1.19) | 1.05 (0.95 to 1.17)  |
| C03DA01                                                                                                                                                                                                             | Spirolactone           | 258 / 219                                                    | 1.18 (0.98 to 1.41) | 1.17 (0.92 to 1.48)  |
| C05AA01                                                                                                                                                                                                             | Hydrocortisone         | 3 / 12                                                       | 0.25 (0.07 to 0.89) | 0.21 (0.05 to 0.83)  |
| C07AB02                                                                                                                                                                                                             | Metoprolol             | 2579 / 2289                                                  | 1.13 (1.07 to 1.19) | 1.11 (1.02 to 1.20)  |
| C07AB03                                                                                                                                                                                                             | Atenolol               | 252 / 285                                                    | 0.88 (0.75 to 1.05) | 0.79 (0.65 to 0.96)  |
| C08CA01                                                                                                                                                                                                             | Amlodipine             | 706 / 718                                                    | 0.98 (0.88 to 1.09) | 0.96 (0.85 to 1.09)  |
| C08CA02                                                                                                                                                                                                             | Felodipine             | 112 / 93                                                     | 1.20 (0.91 to 1.59) | 1.34 (0.96 to 1.87)  |
| C08CA05                                                                                                                                                                                                             | Nifedipine             | 199 / 226                                                    | 0.88 (0.73 to 1.07) | 0.78 (0.62 to 0.97)  |
| C09AA05                                                                                                                                                                                                             | Ramipril               | 709 / 683                                                    | 1.04 (0.93 to 1.15) | 0.94 (0.81 to 1.08)  |

## Supplementary file

|                |                             |             |                     |                     |
|----------------|-----------------------------|-------------|---------------------|---------------------|
| <b>C09BA02</b> | Enalapril and diuretics     | 81 / 101    | 0.80 (0.60 to 1.07) | 0.75 (0.53 to 1.05) |
| <b>C09CA01</b> | Losartan                    | 292 / 310   | 0.94 (0.80 to 1.11) | 0.89 (0.73 to 1.08) |
| <b>C09CA06</b> | Candesartan                 | 360 / 387   | 0.93 (0.81 to 1.07) | 0.92 (0.77 to 1.09) |
| <b>C09DA07</b> | Telmisartan and diuretics   | 17 / 7      | 2.43 (1.01 to 5.86) | 2.26 (0.85 to 6.05) |
| <b>C10AA01</b> | Simvastatin                 | 1806 / 1748 | 1.03 (0.97 to 1.10) | 0.90 (0.82 to 0.98) |
| <b>C10AA03</b> | Pravastatin                 | 143 / 184   | 0.78 (0.62 to 0.97) | 0.67 (0.52 to 0.88) |
| <b>C10AA05</b> | Atorvastatin                | 608 / 580   | 1.05 (0.94 to 1.17) | 0.85 (0.74 to 0.98) |
| <b>D07AC01</b> | Betamethasone               | 76 / 50     | 1.52 (1.06 to 2.17) | 1.31 (0.88 to 1.94) |
| <b>G04BD11</b> | Fesoterodine                | 31 / 47     | 0.66 (0.42 to 1.04) | 0.53 (0.27 to 1.04) |
| <b>H02AB02</b> | Dexamethasone               | 19 / 8      | 2.38 (1.04 to 5.43) | 2.04 (0.77 to 5.35) |
| <b>H02AB06</b> | Prednisolone                | 963 / 823   | 1.17 (1.07 to 1.28) | 1.05 (0.94 to 1.17) |
| <b>H03AA01</b> | Levothyroxine sodium        | 629 / 648   | 0.97 (0.87 to 1.09) | 0.92 (0.80 to 1.06) |
| <b>J01AA02</b> | Doxycycline                 | 324 / 213   | 1.52 (1.28 to 1.81) | 1.51 (1.25 to 1.83) |
| <b>J01CA04</b> | Amoxicillin                 | 327 / 168   | 1.95 (1.62 to 2.34) | 2.09 (1.69 to 2.58) |
| <b>J01CA08</b> | Pivmecillinam               | 309 / 211   | 1.46 (1.23 to 1.74) | 1.45 (1.19 to 1.78) |
| <b>J01CE02</b> | Phenoxymethylpenicillin     | 423 / 277   | 1.53 (1.31 to 1.77) | 1.51 (1.29 to 1.77) |
| <b>J01EA01</b> | Trimethoprim                | 149 / 114   | 1.31 (1.02 to 1.67) | 1.38 (1.03 to 1.84) |
| <b>J01FA01</b> | Erythromycin                | 156 / 89    | 1.75 (1.35 to 2.27) | 1.66 (1.22 to 2.24) |
| <b>J01FA09</b> | Clarithromycin              | 59 / 30     | 1.97(1.27 to 3.05)  | 1.59 (1.00 to 2.53) |
| <b>J01FF01</b> | Clindamycin                 | 72 / 49     | 1.47 (1.02 to 2.11) | 1.39 (0.91 to 2.12) |
| <b>J01MA02</b> | Ciprofloxacin               | 194 / 134   | 1.45 (1.16 to 1.80) | 1.43 (1.10 to 1.86) |
| <b>J01XE01</b> | Nitrofurantoin              | 105 / 66    | 1.59 (1.17 to 2.16) | 1.62 (1.12 to 2.33) |
| <b>L03AA13</b> | pegfigrastim                | 16 / 8      | 2.00 (0.86 to 4.67) | 2.41 (0.75 to 7.73) |
| <b>L04AB01</b> | Etanercept                  | 15 / 22     | 0.68 (0.35 to 1.31) | 0.54(0.24 to 1.21)  |
| <b>M01AB05</b> | Diclofenac                  | 504 / 387   | 1.30 (1.14 to 1.49) | 1.26(1.07 to 1.47)  |
| <b>M04AA01</b> | Allopurinol                 | 351 / 394   | 0.89 (0.77 to 1.03) | 0.85 (0.70 to 1.04) |
| <b>N02AA01</b> | Morphine                    | 137 / 67    | 2.04 (1.53 to 2.74) | 1.84 (1.21 to 2.79) |
| <b>N02AA05</b> | Oxycodone                   | 252 / 191   | 1.32 (1.09 to 1.59) | 1.40 (1.07 to 1.84) |
| <b>N02AA59</b> | Codeine, combinations       | 1386 / 1202 | 1.15 (1.07 to 1.25) | 1.14 (1.03 to 1.25) |
| <b>N02AG01</b> | Morphine and antispasmodics | 28 / 2      | 14.0 (3.34 to 58.8) | 6.66 (2.31 to 19.3) |
| <b>N02AX02</b> | Tramadol                    | 512 / 431   | 1.19 (1.05 to 1.35) | 1.24 (1.05 to 1.45) |

## Supplementary file

|                |                                      |             |                     |                     |
|----------------|--------------------------------------|-------------|---------------------|---------------------|
| <b>N02BE01</b> | Paracetamol                          | 1412 / 1290 | 1.09 (1.01 to 1.18) | 1.02 (0.93 to 1.12) |
| <b>N03AE01</b> | Clonazepam                           | 51 / 69     | 0.74 (0.51 to 1.06) | 0.60 (0.36 to 1.01) |
| <b>N03AX16</b> | Pregabalin                           | 112 / 128   | 0.88 (0.68 to 1.13) | 0.69 (0.48 to 0.98) |
| <b>N05AD01</b> | Haloperidol                          | 55 / 35     | 1.57 (1.03 to 2.40) | 1.71 (0.88 to 3.31) |
| <b>N05BA01</b> | Diazepam                             | 664 / 575   | 1.15 (1.03 to 1.29) | 1.06 (0.93 to 1.22) |
| <b>N05BA04</b> | Oxazepam                             | 828 / 757   | 1.09 (0.99 to 1.21) | 1.04 (0.92 to 1.17) |
| <b>N05CF01</b> | Zopiclone                            | 1618 / 1460 | 1.11 (1.03 to 1.19) | 1.06 (0.97 to 1.17) |
| <b>N05CF02</b> | Zolpidem                             | 175 / 191   | 0.92 (0.75 to 1.12) | 0.85 (0.67 to 1.07) |
| <b>N06AB04</b> | Citalopram                           | 170 / 182   | 0.93 (0.76 to 1.15) | 0.85 (0.66 to 1.11) |
| <b>N06AB06</b> | Sertraline                           | 90 / 98     | 0.92 (0.69 to 1.22) | 0.78 (0.53 to 1.13) |
| <b>N06AB10</b> | Escitalopram                         | 333 / 352   | 0.95 (0.81 to 1.10) | 0.89 (0.73 to 1.09) |
| <b>N06AX16</b> | Venlafaxine                          | 91 / 103    | 0.88 (0.67 to 1.17) | 0.79 (0.54 to 1.15) |
| <b>P01AB01</b> | Metronidazole                        | 51 / 51     | 1.00 (0.68 to 1.47) | 0.60 (0.38 to 0.94) |
| <b>R01AD09</b> | Mometasone                           | 83 / 100    | 0.83 (0.62 to 1.11) | 0.74 (0.54 to 1.03) |
| <b>R03AC02</b> | Salbutamol                           | 653 / 532   | 1.23 (1.09 to 1.37) | 1.16 (1.00 to 1.34) |
| <b>R03AC03</b> | Terbutaline                          | 92 / 77     | 1.19 (0.88 to 1.62) | 1.24 (0.89 to 1.73) |
| <b>R03AK06</b> | Salmeterol and other anti-asthmatics | 250 / 278   | 0.90 (0.76 to 1.07) | 0.83 (0.69 to 1.00) |
| <b>R03BA02</b> | Budesonide                           | 40 / 56     | 0.71 (0.48 to 1.07) | 0.71 (0.44 to 1.14) |
| <b>R03BA05</b> | Fluticasone                          | 34 / 42     | 0.81 (0.52 to 1.27) | 0.66 (0.39 to 1.12) |
| <b>R05CB01</b> | Acetylcysteine                       | 519 / 394   | 1.32 (1.16 to 1.50) | 1.11 (0.96 to 1.30) |
| <b>R05DA01</b> | Ethylmorphine                        | 288 / 199   | 1.45 (1.21 to 1.73) | 1.35 (1.10 to 1.66) |
| <b>R05FA02</b> | Opium derivatives and expectorants   | 71 / 35     | 2.03 (1.35 to 3.04) | 1.59 (1.00 to 2.54) |
| <b>S01EA05</b> | Brimonidine                          | 37 / 10     | 3.70 (1.84 to 7.44) | 3.21 (1.51 to 6.84) |
| <b>S01ED02</b> | Betaxolol                            | 7 / 18      | 0.39 (0.16 to 0.93) | 0.46 (0.18 to 1.18) |

<sup>a</sup> Case-crossover analysis, case period (1 to 7 days) and control period (15 to 21 days) before the index-date for the diagnosis of AMI.

<sup>b</sup> Data from the Norwegian Prescription Database, 2004-2014

<sup>c</sup> In BOLASSO, the effect of each selected drugs is controlled for the effect of other selected drugs.

<sup>d</sup> Classified according to Anatomical Therapeutic Chemical (ATC), 5<sup>th</sup> level

Supplementary file

**Table S2. Relative risks of acute myocardial infarction within 7 days after the drug was dispensed<sup>a</sup>. Univariable and BOLASSO results for drugs selected by BOLASSO in Sweden<sup>b</sup>**

| ATC <sup>d</sup> | Drug Name                             | Case window<br>(N exposed)<br>/Control window<br>(N exposed) | Univariable         | BOLASSO <sup>c</sup> |
|------------------|---------------------------------------|--------------------------------------------------------------|---------------------|----------------------|
|                  |                                       |                                                              | RR (95% CI)         | RR (95% CI)          |
| A02AD01          | Ordinary Salt Combinations            | 58 / 34                                                      | 1.71 (1.12 to 2.60) | 1.44 (0.91 to 2.28)  |
| A02BC01          | Omeprazole                            | 8870 / 8261                                                  | 1.07 (1.04 to 1.11) | 1.12 (1.07 to 1.18)  |
| A02BC05          | Esomeprazole                          | 871 / 802                                                    | 1.09 (0.99 to 1.20) | 1.09 (0.96 to 1.25)  |
| A02BX02          | Sucralfate                            | 43 / 22                                                      | 1.95 (1.17 to 3.27) | 2.53 (1.21 to 5.29)  |
| A03AB02          | Glycopyrronium Bromide                | 52 / 8                                                       | 6.50 (3.09 to 13.7) | 4.19 (1.77 to 9.89)  |
| A03AD01          | Papaverine                            | 96 / 68                                                      | 1.41 (1.03 to 1.93) | 1.54 (1.05 to 2.25)  |
| A03FA01          | Metoclopramide                        | 709 / 503                                                    | 1.41 (1.26 to 1.58) | 1.49 (1.28 to 1.73)  |
| A06AB08          | Sodium picosulfate                    | 632 / 621                                                    | 1.02(0.91 to 1.14)  | 0.87 (0.77 to 0.99)  |
| A06AG10          | Docusate sodium, incl. combinations   | 53 / 22                                                      | 2.41 (1.47 to 3.96) | 1.79 (1.03 to 3.10)  |
| A07AA02          | Nystatin                              | 372 / 248                                                    | 1.50 (1.28 to 1.76) | 1.48 (1.23 to 1.78)  |
| A10AD05          | Insulin Aspart                        | 889 / 907                                                    | 0.98 (0.89 to 1.08) | 0.95 (0.86 to 1.04)  |
| A10AE04          | Insulin Glargine                      | 389 / 462                                                    | 0.84 (0.74 to 0.96) | 0.85 (0.72 to 1.00)  |
| A10BA02          | Metformin                             | 2659 / 2896                                                  | 0.92 (0.87 to 0.97) | 0.86 (0.79 to 0.94)  |
| A10BB01          | Glibenclamide                         | 1002 / 1054                                                  | 0.95 (0.87 to 1.04) | 0.91 (0.79 to 1.04)  |
| A11CC03          | Alfacalcidol                          | 458 / 484                                                    | 0.95 (0.83 to 1.08) | 0.86 (0.70 to 1.06)  |
| A11EX            | Vitamin B-Complex, other combinations | 299 / 334                                                    | 0.90 (0.77 to 1.05) | 0.87 (0.73 to 1.05)  |
| A11HA03          | Tocopherol                            | 31 / 46                                                      | 0.67 (0.43 to 1.06) | 0.58 (0.33 to 1.03)  |
| A12BA01          | Potassium Chloride                    | 2035 / 1914                                                  | 1.06 (0.99 to 1.13) | 1.10 (0.98 to 1.23)  |
| B01AB05          | Enoxaparin                            | 126 / 93                                                     | 1.35 (1.04 to 1.77) | 1.34 (0.98 to 1.83)  |
| B01AC04          | Clopidogrel                           | 1290 / 852                                                   | 1.51 (1.39 to 1.65) | 1.78 (1.57 to 2.01)  |
| B01AC06          | Acetylsalicylic acid                  | 15489 / 15240                                                | 1.02 (0.99 to 1.04) | 0.99 (0.95 to 1.03)  |
| B01AC07          | Dipyridamole                          | 288 / 343                                                    | 0.84 (0.72 to 0.98) | 0.87 (0.72 to 1.03)  |
| B01AC24          | Ticagrelor                            | 96 / 14                                                      | 6.86 (3.91 to 12.0) | 5.14 (2.85 to 9.26)  |
| B01AF01          | Rivaroxaban                           | 31 / 16                                                      | 1.94 (1.06 to 3.54) | 2.31 (0.96 to 5.55)  |
| B03AA07          | Ferrous sulfate                       | 2429 / 2320                                                  | 1.05 (0.99 to 1.11) | 1.07 (0.97 to 1.19)  |
| B03AC            | Iron, parenteral preparations         | 48 / 29                                                      | 1.66 (1.04 to 2.62) | 1.55 (0.93 to 2.57)  |

## Supplementary file

|                |                                                  |               |                     |                     |
|----------------|--------------------------------------------------|---------------|---------------------|---------------------|
| <b>B03BA01</b> | Cyanocobalamin                                   | 7517 / 7514   | 1.00 (0.97 to 1.03) | 0.99 (0.93 to 1.06) |
| <b>B03BA03</b> | Hydroxocobalamin                                 | 125 / 155     | 0.81 (0.64 to 1.02) | 0.79 (0.61 to 1.01) |
| <b>B03BB01</b> | Folic Acid                                       | 4398 / 4474   | 0.98 (0.94 to 1.02) | 0.90 (0.82 to 0.98) |
| <b>B03XA01</b> | Erythropoietin                                   | 109 / 128     | 0.85 (0.66 to 1.10) | 0.75 (0.56 to 1.00) |
| <b>C01AA05</b> | Digoxin                                          | 2425 / 2387   | 1.02 (0.96 to 1.07) | 0.94 (0.85 to 1.04) |
| <b>C01DA02</b> | Glycerol Trinitrate                              | 5020 / 2949   | 1.70 (1.63 to 1.78) | 1.84 (1.74 to 1.94) |
| <b>C03AA01</b> | Bendroflumethiazide                              | 1376 / 1398   | 0.98 (0.91 to 1.06) | 0.95 (0.86 to 1.05) |
| <b>C03AB01</b> | Bendroflumethiazide and potassium                | 68 / 100      | 0.68 (0.50 to 0.93) | 0.56 (0.38 to 0.83) |
| <b>C03CA01</b> | Furosemide                                       | 14307 / 13807 | 1.04 (1.01 to 1.06) | 1.04 (0.99 to 1.09) |
| <b>C03DA01</b> | Spironolactone                                   | 2716 / 2674   | 1.02 (0.96 to 1.07) | 0.94 (0.86 to 1.03) |
| <b>C03EA01</b> | Hydrochlorothiazide and potassium-sparing agents | 974 / 1082    | 0.90 (0.83 to 0.98) | 0.80 (0.71 to 0.91) |
| <b>C07AB02</b> | Metoprolol                                       | 8861 / 8437   | 1.05 (1.02 to 1.08) | 1.05 (1.00 to 1.11) |
| <b>C07AB03</b> | Atenolol                                         | 2836 / 2823   | 1.00 (0.95 to 1.06) | 1.01 (0.93 to 1.09) |
| <b>C07AB07</b> | Bisoprolol                                       | 2727 / 2562   | 1.06 (1.01 to 1.12) | 1.06 (0.97 to 1.15) |
| <b>C08CA01</b> | Amlodipine                                       | 2512 / 2544   | 0.99 (0.93 to 1.04) | 0.92 (0.85 to 1.00) |
| <b>C08CA02</b> | Felodipine                                       | 3529 / 3617   | 0.98 (0.93 to 1.02) | 0.91 (0.85 to 0.98) |
| <b>C09AA02</b> | Enalapril                                        | 5783 / 5716   | 1.01 (0.98 to 1.05) | 0.98 (0.92 to 1.04) |
| <b>C09AA05</b> | Ramipril                                         | 1870 / 1855   | 1.01 (0.95 to 1.07) | 0.92 (0.83 to 1.02) |
| <b>C09CA01</b> | Losartan                                         | 1728 / 1738   | 0.99 (0.93 to 1.06) | 0.95 (0.86 to 1.05) |
| <b>C09CA04</b> | Irbesartan                                       | 233 / 263     | 0.89 (0.74 to 1.06) | 0.78 (0.61 to 1.01) |
| <b>C09CA06</b> | Candesartan                                      | 1363 / 1448   | 0.94 (0.87 to 1.01) | 0.88 (0.79 to 0.98) |
| <b>C10AA01</b> | Simvastatin                                      | 5611 / 5672   | 0.99 (0.95 to 1.03) | 0.94 (0.88 to 0.99) |
| <b>D07AB02</b> | Hydrocortisone butyrate                          | 143 / 199     | 0.72 (0.58 to 0.89) | 0.78 (0.61 to 0.98) |
| <b>G03CA03</b> | Estradiol                                        | 483 / 545     | 0.89 (0.78 to 1.00) | 0.86 (0.75 to 0.99) |
| <b>G03XC01</b> | Raloxifene                                       | 28 / 18       | 1.56 (0.86 to 2.81) | 2.36 (0.86 to 6.48) |
| <b>G04BD07</b> | Tolterodine                                      | 582 / 629     | 0.93 (0.83 to 1.04) | 0.84 (0.69 to 1.03) |
| <b>G04BE03</b> | Sildenafil                                       | 135 / 180     | 0.75 (0.60 to 0.94) | 0.75 (0.58 to 0.97) |
| <b>G04BE08</b> | Tadalafil                                        | 97 / 132      | 0.73 (0.57 to 0.96) | 0.73 (0.54 to 0.98) |
| <b>G04CA01</b> | Alfuzosin                                        | 824 / 855     | 0.96 (0.86 to 1.06) | 0.87 (0.76 to 1.00) |
| <b>G04CB01</b> | Finasteride                                      | 375 / 494     | 0.76 (0.66 to 0.87) | 0.74 (0.64 to 0.86) |
| <b>H02AB01</b> | Betamethasone                                    | 802 / 568     | 1.41 (1.27 to 1.57) | 1.21 (1.06 to 1.37) |

## Supplementary file

|                |                                      |               |                     |                     |
|----------------|--------------------------------------|---------------|---------------------|---------------------|
| <b>H02AB06</b> | Prednisolone                         | 3692 / 3486   | 1.06 (1.01 to 1.11) | 1.05 (0.97 to 1.13) |
| <b>H03AA01</b> | Levothyroxine Sodium                 | 4843 / 4863   | 0.99 (0.96 to 1.04) | 0.93 (0.86 to 1.01) |
| <b>J01AA02</b> | Doxycycline                          | 1095 / 591    | 1.85 (1.68 to 2.05) | 1.76 (1.58 to 1.96) |
| <b>J01CA04</b> | Amoxicillin                          | 575 / 353     | 1.63 (1.43 to 1.86) | 1.44 (1.24 to 1.66) |
| <b>J01CA08</b> | Pivmecillinam                        | 535 / 422     | 1.27 (1.12 to 1.44) | 1.21 (1.05 to 1.41) |
| <b>J01CE02</b> | Phenoxymethylpenicillin              | 847 / 595     | 1.42 (1.28 to 1.58) | 1.34 (1.20 to 1.50) |
| <b>J01CF05</b> | Flucloxacillin                       | 872 / 943     | 0.92 (0.84 to 1.01) | 0.89 (0.80 to 0.99) |
| <b>J01DB05</b> | Cefadroxil                           | 226 / 157     | 1.44 (1.17 to 1.76) | 1.39 (1.09 to 1.78) |
| <b>J01EA01</b> | Trimethoprim                         | 402 / 281     | 1.43 (1.23 to 1.67) | 1.60 (1.33 to 1.92) |
| <b>J01EE01</b> | Sulfamethoxazole and trimethoprim    | 175 / 119     | 1.47 (1.17 to 1.86) | 1.49 (1.15 to 1.93) |
| <b>J01FA01</b> | Erythromycin                         | 90 / 36       | 2.50 (1.70 to 3.68) | 2.14 (1.39 to 3.30) |
| <b>J01MA02</b> | Ciprofloxacin                        | 830 / 630     | 1.32 (1.19 to 1.46) | 1.35 (1.19 to 1.52) |
| <b>J01XE01</b> | Nitrofurantoin                       | 365 / 249     | 1.47 (1.25 to 1.72) | 1.56 (1.29 to 1.89) |
| <b>J02AC01</b> | Fluconazole                          | 232 / 164     | 1.41 (1.16 to 1.73) | 1.34 (1.06 to 1.69) |
| <b>M01AB05</b> | Diclofenac                           | 1180 / 1001   | 1.18 (1.08 to 1.28) | 1.15 (1.04 to 1.28) |
| <b>M01AH05</b> | Etoricoxib                           | 101 / 118     | 0.86 (0.66 to 1.12) | 0.77 (0.57 to 1.04) |
| <b>M03BA02</b> | Carisoprodol                         | 13 / 29       | 0.45 (0.23 to 0.86) | 0.52 (0.26 to 1.03) |
| <b>M04AA01</b> | Allopurinol                          | 1897 / 1952   | 0.97 (0.91 to 1.04) | 0.93 (0.83 to 1.03) |
| <b>M05BA04</b> | Alendronic Acid                      | 1172 / 1204   | 0.97 (0.90 to 1.05) | 0.92 (0.80 to 1.05) |
| <b>N02AA01</b> | Morphine                             | 2195 / 1515   | 1.45 (1.36 to 1.55) | 1.69 (1.52 to 1.89) |
| <b>N02AA05</b> | Oxycodone                            | 2659 / 2337   | 1.14 (1.08 to 1.20) | 1.21 (1.10 to 1.34) |
| <b>N02AA59</b> | Codeine, combinations                | 1526 / 1391   | 1.10 (1.02 to 1.18) | 1.09 (1.00 to 1.20) |
| <b>N02AB03</b> | Fentanyl                             | 670 / 514     | 1.30 (1.16 to 1.46) | 1.28 (1.11 to 1.48) |
| <b>N02AC04</b> | Dextropropoxyphene                   | 1056 / 1050   | 1.01 (0.92 to 1.10) | 0.93 (0.82 to 1.05) |
| <b>N02AG01</b> | Morphine and antispasmodics          | 256 / 42      | 6.10 (4.40 to 8.45) | 5.92 (4.09 to 8.57) |
| <b>N02AG02</b> | Ketobemidone and antispasmodics      | 50 / 17       | 2.94 (1.70 to 5.10) | 2.28 (1.18 to 4.42) |
| <b>N02BE01</b> | Paracetamol                          | 14481 / 14036 | 1.03 (1.01 to 1.06) | 1.01 (0.97 to 1.05) |
| <b>N04BA02</b> | Levodopa and decarboxylase Inhibitor | 1243 / 1254   | 0.99 (0.92 to 1.07) | 0.89 (0.75 to 1.06) |
| <b>N05AX08</b> | Risperidone                          | 1842 / 1795   | 1.03 (0.96 to 1.10) | 1.14 (0.97 to 1.35) |
| <b>N05BA01</b> | Diazepam                             | 1165 / 957    | 1.22 (1.12 to 1.33) | 1.12 (0.99 to 1.26) |
| <b>N05CD03</b> | Flunitrazepam                        | 556 / 575     | 0.97 (0.86 to 1.09) | 0.84 (0.70 to 1.02) |



## Supplementary file

|                |                                    |             |                     |                    |
|----------------|------------------------------------|-------------|---------------------|--------------------|
| <b>N05CD08</b> | Midazolam                          | 47 / 8      | 5.88 (2.78 to 12.4) | 2.31(1.14 to4.65)  |
| <b>N05CF01</b> | Zopiclone                          | 5999 / 6024 | 1.00 (0.96 to 1.03) | 0.96 (0.90 to1.02) |
| <b>N05CF02</b> | Zolpidem                           | 2555 / 2564 | 1.00 (0.94 to 1.05) | 0.97 (0.89 to1.05) |
| <b>N06AB04</b> | Citalopram                         | 5548 / 5513 | 1.01 (0.97 to 1.04) | 0.97 (0.90 to1.05) |
| <b>N06AB06</b> | Sertraline                         | 1358 / 1360 | 1.00 (0.93 to 1.08) | 0.90 (0.78 to1.04) |
| <b>N06AX11</b> | Mirtazapine                        | 2809 / 2754 | 1.02 (0.97 to1.08)  | 1.06 (0.95 to1.18) |
| <b>P01AB01</b> | Metronidazole                      | 169 / 185   | 0.91 (0.74 to1.13)  | 0.73 (0.57 to0.93) |
| <b>R01AD09</b> | Mometasone                         | 326 / 338   | 0.96 (0.83 to1.12)  | 0.87 (0.73 to1.03) |
| <b>R03AC02</b> | Salbutamol                         | 618 / 526   | 1.17 (1.05 to1.32)  | 1.12 (0.98 to1.28) |
| <b>R03AC03</b> | Terbutali                          | 968 / 787   | 1.23 (1.12 to1.35)  | 1.16 (1.04 to1.30) |
| <b>R03AC12</b> | Salmeterol                         | 73 / 56     | 1.30 (0.92 to1.85)  | 1.35 (0.92 to1.98) |
| <b>R03AK07</b> | Formoterol and budesonide          | 941 / 810   | 1.16 (1.06 to1.28)  | 1.12 (1.00 to1.25) |
| <b>R03AL02</b> | Salbutamol and ipratropium bromide | 387 / 322   | 1.20 (1.04 to1.39)  | 1.13 (0.95 to1.34) |
| <b>R03BB04</b> | Tiotropium Bromide                 | 857 / 823   | 1.04 (0.95 to1.15)  | 0.94 (0.84 to1.06) |
| <b>R03DA02</b> | Choline theophyllinate             | 105 / 59    | 1.78 (1.29 to2.45)  | 1.69 (1.12 to2.55) |
| <b>R05CB01</b> | Acetylcysteine                     | 1677 / 1375 | 1.22 (1.14 to1.31)  | 1.14 (1.05 to1.24) |
| <b>R05CB10</b> | Mucolytics                         | 733 / 422   | 1.74 (1.54 to1.96)  | 1.53 (1.34 to1.75) |
| <b>R05DA20</b> | Opium Alkaloids and derivatives    | 62 / 23     | 2.70 (1.67 to4.35)  | 2.37 (1.35 to4.16) |
| <b>R05FA02</b> | Opium Derivatives and expectorants | 828 / 438   | 1.89 (1.68 to2.12)  | 1.73 (1.52 to1.97) |
| <b>S01BA02</b> | Hydrocortisone                     | 17 / 40     | 0.43 (0.24 to0.75)  | 0.53 (0.28 to1.02) |
| <b>S01ED51</b> | Timolol, Combinations              | 508 / 481   | 1.06 (0.93 to1.20)  | 1.10 (0.95 to1.27) |
| <b>V03AE02</b> | Sevelamer                          | 95 / 77     | 1.23 (0.91 to1.67)  | 1.39 (0.99 to1.97) |
| <b>Y92BA00</b> | Teststickor För Blodglukos         | 1634 / 1667 | 0.98 (0.92 to1.05)  | 0.95 (0.87 to1.04) |
| <b>Y92EA00</b> | Lancetter Till Blodprovstagare     | 325 / 286   | 1.14 (0.97 to1.33)  | 1.18 (0.98 to1.43) |

<sup>a</sup> Case-crossover analysis, case period (1 to 7 days) and control period (15 to 21 days) before the index-date for the diagnosis of AMI.

<sup>b</sup> Data from the Swedish Prescribed Drug Register, 2005 to 2014

<sup>c</sup> In BOLASSO, the effect of each selected drugs is controlled for the effect of other selected drugs.

<sup>d</sup> Classified according to Anatomical Therapeutic Chemical (ATC), 5<sup>th</sup> level

Supplementary file

**Table S3 Relative risks of acute myocardial infarction within 14 days after the drug was dispensed<sup>a</sup>, selected by BOLASSO<sup>b</sup> approach in both countries.**

|                  |                                 | SWEDEN <sup>c</sup>      |                             |                   | NORWAY <sup>d</sup>      |                             |                   | TOTAL <sup>e</sup>            |
|------------------|---------------------------------|--------------------------|-----------------------------|-------------------|--------------------------|-----------------------------|-------------------|-------------------------------|
| ATC <sup>f</sup> | Drug Names                      | Case window (exposed); N | Control window (exposed); N | RR (95% CI)       | Case window (exposed); N | Control window (exposed); N | RR (95% CI)       | Combined Estimate RR (95% CI) |
| A02BC01          | Omeprazole                      | 16268                    | 14553                       | 1.19 (1.14 -1.24) | 411                      | 369                         | 1.12 (0.93-1.34)  | 1.18 (1.13-1.23)              |
| A02BC05          | Esomeprazole                    | 1561                     | 1364                        | 1.22 (1.09-1.37)  | 1261                     | 1025                        | 1.29 (1.16-1.43)  | 1.26 (1.16-1.36)              |
| A03FA01          | Metoclopramide                  | 1181                     | 790                         | 1.48 (1.31-1.68)  | 529                      | 307                         | 1.60 (1.32-1.93)  | 1.52 (1.37-1.68)              |
| A07AA02          | Nystatin                        | 633                      | 362                         | 1.55 (1.35 -1.79) | 113                      | 79                          | 1.39 (0.99-1.96)  | 1.53 (1.34 -1.74)             |
| A10BA02          | Metformin                       | 5076                     | 5268                        | 0.87 (0.82-0.93)  | 1297                     | 1301                        | 0.94 (0.84-1.04)  | 0.89 (0.84 -0.94)             |
| A12AX            | Calcium                         | 6480                     | 6440                        | 0.97 (0.91-1.03)  | 953                      | 971                         | 0.90 (0.78-1.03)  | 0.96 (0.91-1.01)              |
| B01AA03          | Warfarin                        | 2285                     | 2357                        | 0.90 (0.85-0.96)  | 920                      | 940                         | 0.91 (0.81-1.01)  | 0.90 (0.86-0.95)              |
| B01AB05          | Enoxaparin                      | 219                      | 153                         | 1.44 (1.11-1.87)  | 134                      | 88                          | 1.65 (1.15-2.37)  | 1.51 (1.22-1.86)              |
| B01AC04          | Clopidogrel                     | 2157                     | 1565                        | 1.58 (1.44-1.74)  | 578                      | 395                         | 1.53 (1.29-1.80)  | 1.57 (1.44-1.70)              |
| B01AC06          | Acetylsalicylic Acid            | 29062                    | 27782                       | 0.98 (0.95-1.01)  | 5678                     | 5178                        | 1.03 (0.98-1.09)  | 0.99 (0.97-1.02)              |
| B01AC24          | Ticagrelor                      | 108                      | 19                          | 4.20 (2.42-7.30)  | 39                       | 7                           | 5.21 (2.18-12.5)  | 4.47 (2.80-7.12)              |
| C01DA02          | Glyceral Trinitrate             | 8094                     | 4635                        | 1.87 (1.79-1.96)  | 2668                     | 1278                        | 2.29 (2.11-2.48)  | 1.96 (1.89-2.04)              |
| C01DA14          | Isosorbide Mononitrate          | 10659                    | 9412                        | 1.08 (1.02-1.13)  | 1935                     | 1659                        | 1.06 (0.96-1.17)  | 1.08 (1.03-1.13)              |
| C03AB01          | Bendroflumethiazide & Potassium | 141                      | 186                         | 0.68 (0.51-0.91)  | 229                      | 166                         | 1.48 (1.17-1.88)  | 1.08 (0.90- 1.30)             |
| C03CA01          | Furosemide                      | 26628                    | 24790                       | 1.08 (1.03-1.12)  | 2395                     | 2226                        | 1.01 (0.93 -1.11) | 1.07 (1.03 -1.11)             |
| C03DA01          | Spironolactone                  | 5025                     | 4805                        | 0.96 (0.89-1.03)  | 418                      | 419                         | 0.87 (0.72-1.05)  | 0.95 (0.89-1.02)              |
| C07AB02          | Metoprolol                      | 16589                    | 15251                       | 1.08 (1.04-1.13)  | 4635                     | 4118                        | 1.09 (1.02-1.16)  | 1.08 (1.05-1.12)              |
| C07AB07          | Bisoprolol                      | 5082                     | 4588                        | 1.09 (1.01-1.16)  | 440                      | 388                         | 1.15 (0.95-1.39)  | 1.10 (1.03-1.17)              |
| C08CA01          | Amlodipine                      | 4814                     | 4774                        | 0.93 (0.88-0.99)  | 1308                     | 1345                        | 0.88 (0.80-0.97)  | 0.92 (0.87-0.96)              |
| C09AA03          | Isinopril                       | 384                      | 399                         | 0.85 (0.68-1.06)  | 371                      | 317                         | 1.18 (0.98-1.42)  | 1.03 (0.89-1.19)              |
| C09CA03          | Valsartan                       | 347                      | 376                         | 0.76 (0.62-0.94)  | 219                      | 184                         | 1.17 (0.93-1.47)  | 0.92 (0.79-1.08)              |
| C09CA06          | Candesartan                     | 2639                     | 2618                        | 0.96 (0.89-1.04)  | 693                      | 669                         | 1.15 (0.98-1.37)  | 0.99 (0.92-1.06)              |
| C10AA01          | Simvastatin                     | 10637                    | 10262                       | 0.94 (0.90-0.98)  | 3322                     | 3210                        | 0.92 (0.86-0.98)  | 0.93 (0.90-0.97)              |
| C10AA03          | Pravastatin                     | 311                      | 364                         | 0.74 (0.60-0.91)  | 280                      | 296                         | 0.77 (0.62-0.96)  | 0.75 (0.65-0.88)              |

## Supplementary file

|                |                                 |       |       |                  |      |      |                   |                  |
|----------------|---------------------------------|-------|-------|------------------|------|------|-------------------|------------------|
| <b>C10AA05</b> | Atorvastatin                    | 1784  | 1639  | 0.97 (0.88-1.06) | 1130 | 1003 | 0.94 (0.84-1.05)  | 0.96 (0.89-1.03) |
| <b>G03FA01</b> | Norethisterone And Estrogen     | 87    | 120   | 0.68 (0.48-0.96) | 51   | 70   | 0.73 (0.50-1.07)  | 0.70 (0.54-0.91) |
| <b>G04BD07</b> | Tolterodine                     | 1107  | 1165  | 0.77 (0.66-0.91) | 186  | 205  | 0.78 (0.58-1.04)  | 0.77 (0.67-0.89) |
| <b>H02AB06</b> | Prednisolone                    | 6819  | 6259  | 1.09 (1.02-1.16) | 1690 | 1419 | 1.14 (1.04-1.25)  | 1.11 (1.05-1.17) |
| <b>H03AA01</b> | Levothyroxine Sodium            | 9399  | 9173  | 0.96 (0.90-1.03) | 1212 | 1296 | 0.84 (0.75-0.94)  | 0.93 (0.88-0.98) |
| <b>J01AA02</b> | Doxycycline                     | 1709  | 1019  | 1.54 (1.42-1.68) | 524  | 277  | 1.72 (1.48-2.01)  | 1.58 (1.47-1.70) |
| <b>J01CA04</b> | Amoxicillin                     | 937   | 599   | 1.48 (1.32-1.66) | 511  | 296  | 1.59 (1.34-1.89)  | 1.51 (1.38-1.66) |
| <b>J01CA08</b> | Pivmecillinam                   | 934   | 695   | 1.32 (1.19-1.48) | 507  | 409  | 1.26 (1.09-1.47)  | 1.30 (1.19-1.42) |
| <b>J01CE02</b> | Phenoxymethylpenicillin         | 1332  | 985   | 1.26 (1.15-1.38) | 675  | 452  | 1.46 (1.28-1.66)  | 1.32 (1.23-1.43) |
| <b>J01FA01</b> | Erythromycin                    | 130   | 78    | 1.68 (1.21-2.34) | 232  | 142  | 1.52 (1.21-1.91)  | 1.57 (1.30-1.89) |
| <b>J01FF01</b> | Clindamycin                     | 593   | 516   | 1.12 (0.97-1.29) | 123  | 72   | 1.61 (1.15-2.26)  | 1.18 (1.04-1.35) |
| <b>J01MA02</b> | Ciprofloxacin                   | 1454  | 970   | 1.46 (1.33-1.60) | 315  | 238  | 1.32 (1.09-1.61)  | 1.43 (1.32-1.56) |
| <b>J01XE01</b> | Nitrofurantoin                  | 610   | 405   | 1.64 (1.41-1.90) | 171  | 132  | 1.40 (1.06-1.86)  | 1.58 (1.39-1.81) |
| <b>L01BC06</b> | Capecitabine                    | 51    | 21    | 2.02 (0.92-4.44) | 19   | 4    | 2.74 (0.92-8.13)  | 2.24 (1.19-4.24) |
| <b>M01AB05</b> | Diclofenac                      | 2158  | 1934  | 1.08 (1.00-1.16) | 848  | 676  | 1.22 (1.09-1.36)  | 1.12 (1.06-1.19) |
| <b>M01AX05</b> | Glucosamine                     | 504   | 542   | 0.87 (0.74-1.02) | 98   | 144  | 0.64 (0.47-0.87)  | 0.82 (0.71-0.94) |
| <b>N02AA01</b> | Morphine                        | 3629  | 2468  | 2.02 (1.83-2.24) | 213  | 119  | 1.55 (1.10-2.18)  | 1.98 (1.80-2.18) |
| <b>N02AA05</b> | Oxycodone                       | 4805  | 3879  | 1.41 (1.30-1.53) | 471  | 342  | 1.69 (1.34-2.13)  | 1.44 (1.33-1.55) |
| <b>N02AA59</b> | Codeine, Combinations           | 2749  | 2484  | 1.12 (1.03-1.21) | 2450 | 2102 | 1.18 (1.09-1.28)  | 1.15 (1.09-1.22) |
| <b>N02AB03</b> | Fentanyl                        | 1190  | 897   | 1.41 (1.24-1.59) | 220  | 151  | 1.49 (1.09-2.05)  | 1.42 (1.27-1.60) |
| <b>N02AG01</b> | Morphine and antispasmodics     | 314   | 57    | 5.86 (4.15-8.27) | 32   | 0    | 18.74(8.71-40.34) | 7.13 (5.20-9.76) |
| <b>N02AG02</b> | Ketobemidone and antispasmodics | 74    | 34    | 2.45 (1.42-4.21) | 30   | 16   | 2.40 (0.87-6.61)  | 2.44 (1.51-3.94) |
| <b>N02AX02</b> | Tramadol                        | 3963  | 3748  | 1.06 (0.99-1.13) | 905  | 745  | 1.22 (1.07-1.38)  | 1.09 (1.03-1.16) |
| <b>N02BE01</b> | Paracetamol                     | 27229 | 25369 | 1.03 (1.00-1.07) | 2585 | 2308 | 1.06 (0.98-1.14)  | 1.04 (1.00-1.07) |
| <b>N05BA01</b> | Diazepam                        | 2062  | 1731  | 1.19 (1.07-1.31) | 1182 | 1049 | 1.06 (0.96-1.18)  | 1.12 (1.05-1.21) |
| <b>N05BA04</b> | Oxazepam                        | 9286  | 8644  | 1.09 (1.03-1.15) | 1540 | 1360 | 1.12 (1.01-1.24)  | 1.11 (1.03-1.19) |
| <b>N05CF01</b> | Zopiclone                       | 11300 | 10828 | 1.03 (0.97-1.08) | 2920 | 2816 | 0.97 (0.91-1.04)  | 1.01 (0.97-1.05) |
| <b>N06AX11</b> | Mirtazapine                     | 5299  | 4958  | 1.19 (1.08-1.30) | 339  | 302  | 1.20 (0.94-1.53)  | 1.19 (1.09-1.30) |
| <b>R01AD09</b> | Mometasone                      | 628   | 620   | 0.93 (0.82-1.05) | 151  | 193  | 0.68 (0.53-0.86)  | 0.87 (0.78-0.97) |
| <b>R03AC02</b> | Salbutamol                      | 1121  | 942   | 1.19 (1.06-1.33) | 1176 | 987  | 1.20 (1.07-1.34)  | 1.20 (1.10-1.29) |

## Supplementary file

|                |                                 |      |      |                  |     |     |                  |                  |
|----------------|---------------------------------|------|------|------------------|-----|-----|------------------|------------------|
| <b>R03AK06</b> | Salmeterol and fluticasone      | 603  | 600  | 0.91 (0.80-1.04) | 475 | 525 | 0.80 (0.69-0.94) | 0.86 (0.78-0.95) |
| <b>R03BA02</b> | Budesonide                      | 1145 | 1112 | 0.90 (0.81-0.99) | 86  | 93  | 0.76 (0.54-1.06) | 0.89 (0.81-0.98) |
| <b>R03BB04</b> | Tiotropium Bromide              | 1627 | 1661 | 0.89 (0.81-0.98) | 394 | 417 | 0.87 (0.74-1.01) | 0.88 (0.82-0.96) |
| <b>S03CA04</b> | Hydrocortisone & antiinfectives | 456  | 498  | 0.90 (0.78-1.02) | 58  | 73  | 0.75 (0.52-1.08) | 0.88 (0.78-1.00) |

<sup>a</sup> Case-crossover analysis, case period (1 to 14 days) and control period (29 to 42 days) before the index date for the diagnosis of AMI. <sup>b</sup> In BOLASSO, the effect of each selected drugs is controlled for the effect of other selected drugs.

<sup>c</sup> Data from the Swedish Prescribed Drug Register , 2005 to 2014

<sup>d</sup> Data from the Norwegian Prescription Database, 2004 to 2014

<sup>e</sup> Combined estimates of Norwegian and Swedish data calculated using fixed-effect

<sup>f</sup> Classified according to Anatomical Therapeutic Chemical (ATC), 5<sup>th</sup> level

Supplementary file

**Table S4 Relative risks of acute myocardial infarction within 7 days after the drug was dispensed<sup>a</sup>, selected by BOLASSO<sup>b</sup> approach in both countries. AMI diagnosed in hospital only.**

|                  |                                          | SWEDEN <sup>c</sup>      |                             |                  | NORWAY <sup>d</sup>      |                             |                  | TOTAL <sup>e</sup>               |
|------------------|------------------------------------------|--------------------------|-----------------------------|------------------|--------------------------|-----------------------------|------------------|----------------------------------|
| ATC <sup>f</sup> | Drug Names                               | Case window (exposed); N | Control window (exposed); N | RR (95% CI)      | Case window (exposed); N | Control window (exposed); N | RR (95% CI)      | Combined Estimate<br>RR (95% CI) |
|                  | <b><i>Narcotic analgesics</i></b>        |                          |                             |                  |                          |                             |                  |                                  |
| R05FA02          | Opium derivatives and expectorants       | 695                      | 391                         | 1.60 (1.39-1.85) | 61                       | 29                          | 1.66 (1.00-2.75) | 1.60 (1.40- 1.84)                |
| N02AA05          | Oxycodone                                | 1952                     | 1735                        | 1.17 (1.04-1.31) | 195                      | 146                         | 1.45 (1.09-1.94) | 1.21 (1.08- 1.34)                |
| N02AA59          | Codeine, combinations                    | 1234                     | 1143                        | 1.06 (0.96-1.17) | 1078                     | 991                         | 1.07 (0.97-1.18) | 1.07 (0.99-1.14)                 |
|                  | <b><i>Antibiotics</i></b>                |                          |                             |                  |                          |                             |                  |                                  |
| J01FA01          | Erythromycin                             | 82                       | 30                          | 2.37 (1.47-3.84) | 130                      | 71                          | 1.77 (1.27-2.48) | 1.95 (1.48- 2.56)                |
| J01XE01          | Nitrofurantoin                           | 316                      | 189                         | 1.74 (1.42-2.13) | 92                       | 54                          | 1.71 (1.14-2.58) | 1.73 (1.45- 2.08)                |
| J01EA01          | Trimethoprim                             | 318                      | 202                         | 1.79 (1.45-2.20) | 119                      | 90                          | 1.42 (1.03-1.95) | 1.67 (1.40- 1.99)                |
| J01AA02          | Doxycycline                              | 916                      | 526                         | 1.63 (1.45-1.84) | 264                      | 174                         | 1.52 (1.23-1.89) | 1.60 (1.45- 1.78)                |
| J01CA04          | Amoxicillin                              | 456                      | 295                         | 1.38 (1.17-1.62) | 264                      | 135                         | 2.12 (1.69-2.67) | 1.59 (1.40-1.82)                 |
| J01MA02          | Ciprofloxacin                            | 677                      | 504                         | 1.38 (1.20-1.58) | 156                      | 103                         | 1.55 (1.16-2.07) | 1.41 (1.25- 1.60)                |
| J01EE01          | Sulfamethoxazole & trimethoprim          | 142                      | 100                         | 1.39 (1.06-1.84) | 70                       | 43                          | 1.46 (0.96-2.23) | 1.41 (1.12- 1.78)                |
| J01CE02          | Phenoxymethylpenicillin                  | 702                      | 514                         | 1.30 (1.14-1.47) | 337                      | 226                         | 1.45 (1.21-1.75) | 1.35 (1.21- 1.50)                |
| J01CA08          | Pivmecillinam                            | 442                      | 351                         | 1.23 (1.05-1.45) | 256                      | 173                         | 1.50 (1.21-1.85) | 1.32 (1.16- 1.50)                |
|                  | <b><i>Antithrombotic agents</i></b>      |                          |                             |                  |                          |                             |                  |                                  |
| B01AC24          | Ticagrelor                               | 94                       | 13                          | 5.22 (2.83-9.64) | 26                       | 6                           | 3.11 (1.26-7.70) | 4.44 (2.67- 7.37)                |
| B01AC04          | Clopidogrel                              | 1126                     | 701                         | 1.82 (1.61-2.06) | 319                      | 214                         | 1.40 (1.14-1.72) | 1.70 (1.53-1.89)                 |
| B01AB05          | Enoxaparin                               | 107                      | 72                          | 1.41 (1.00-2.00) | 66                       | 29                          | 2.46 (1.35-4.48) | 1.62 (1.20-2.19)                 |
| B01AC06          | Acetylsalicylic acid                     | 11864                    | 11515                       | 1.01 (0.96-1.05) | 2694                     | 2396                        | 1.11 (1.02-1.20) | 1.03 (0.99-1.07)                 |
|                  | <b><i>Adrenergics</i></b>                |                          |                             |                  |                          |                             |                  |                                  |
| R03AC03          | Terbutaline                              | 831                      | 667                         | 1.16 (1.03-1.31) | 75                       | 58                          | 1.42 (0.96-2.10) | 1.18 (1.05-1.32)                 |
| R03AC02          | Salbutamol                               | 527                      | 449                         | 1.12 (0.97-1.30) | 510                      | 426                         | 1.12 (0.95-1.32) | 1.12 (1.00- 1.25)                |
|                  | <b><i>Protonpump inhibitor</i></b>       |                          |                             |                  |                          |                             |                  |                                  |
| A02BC01          | Omeprazole                               | 6698                     | 6126                        | 1.14 (1.07-1.20) | 204                      | 186                         | 1.17 (0.92-1.48) | 1.15 (1.08- 1.21)                |
|                  | <b><i>Vasodilator</i></b>                |                          |                             |                  |                          |                             |                  |                                  |
| C01DA02          | Glycerol trinitrate                      | 4607                     | 2656                        | 1.88 (1.78-1.99) | 1549                     | 729                         | 2.27 (2.05-2.52) | 1.96 (1.87-2.06)                 |
|                  | <b><i>Antiinflammatory drug</i></b>      |                          |                             |                  |                          |                             |                  |                                  |
| M01AB05          | Diclofenac                               | 1033                     | 854                         | 1.19 (1.07-1.33) | 434                      | 340                         | 1.19 (1.02-1.40) | 1.19 (1.09-1.30)                 |
|                  | <b><i>Prokinetic/antiemetic drug</i></b> |                          |                             |                  |                          |                             |                  |                                  |

## Supplementary file

|                |                                 |       |       |                  |      |      |                  |                  |
|----------------|---------------------------------|-------|-------|------------------|------|------|------------------|------------------|
| <b>A03FA01</b> | Metoclopramide                  | 464   | 348   | 1.40 (1.16-1.69) | 232  | 153  | 1.39 (1.06-1.81) | 1.40 (1.20-1.63) |
|                | <b>Mucolytics</b>               |       |       |                  |      |      |                  |                  |
| <b>R05CB01</b> | Acetylcysteine                  | 1360  | 1105  | 1.15 (1.05-1.27) | 394  | 312  | 1.07 (0.91-1.26) | 1.13 (1.04-1.23) |
|                | <b>Glucocorticoid</b>           |       |       |                  |      |      |                  |                  |
| <b>H02AB06</b> | Prednisolone                    | 2883  | 2659  | 1.06 (0.98-1.15) | 804  | 671  | 1.08 (0.95-1.23) | 1.07 (1.00-1.14) |
|                | <b>Betatoblocker</b>            |       |       |                  |      |      |                  |                  |
| <b>C07AB02</b> | Metoprolol                      | 6969  | 6602  | 1.03 (0.98-1.09) | 2152 | 1909 | 1.09 (1.00-1.20) | 1.05 (1.00-1.09) |
|                | <b>Nontoxic analgesic</b>       |       |       |                  |      |      |                  |                  |
| <b>N02BE01</b> | Paracetamol                     | 10453 | 10145 | 1.02 (0.98-1.07) | 1165 | 1059 | 1.04 (0.93-1.15) | 1.02 (0.98-1.06) |
|                | <b>Anxiolytic</b>               |       |       |                  |      |      |                  |                  |
| <b>N05BA04</b> | Oxazepam                        | 3331  | 3250  | 0.99 (0.92-1.07) | 656  | 597  | 1.04 (0.91-1.19) | 1.00 (0.94-1.07) |
|                | <b>Hypnotics and sedatives</b>  |       |       |                  |      |      |                  |                  |
| <b>N05CF01</b> | Zopiclone                       | 4299  | 4312  | 0.95 (0.89-1.01) | 1302 | 1187 | 1.05 (0.95-1.16) | 0.98 (0.93-1.03) |
| <b>N05CF02</b> | Zolpidem                        | 2022  | 2054  | 0.94 (0.86-1.02) | 147  | 162  | 0.82 (0.63-1.07) | 0.93 (0.86-1.01) |
|                | <b>Calcium Channel blockers</b> |       |       |                  |      |      |                  |                  |
| <b>C08CA02</b> | Felodipine                      | 2955  | 2984  | 0.93 (0.86-1.01) | 103  | 81   | 1.51 (1.04-2.19) | 0.95 (0.88-1.03) |
| <b>C08CA01</b> | Amlodipine                      | 2090  | 2119  | 0.91 (0.84-1.00) | 600  | 620  | 0.95 (0.83-1.09) | 0.92 (0.86-0.99) |
|                | <b>ACE inhibitor</b>            |       |       |                  |      |      |                  |                  |
| <b>C09AA05</b> | Ramipril                        | 1439  | 1407  | 0.93 (0.84-1.04) | 547  | 540  | 0.93 (0.80-1.08) | 0.93 (0.85-1.02) |
|                | <b>Lipid modifying agent</b>    |       |       |                  |      |      |                  |                  |
| <b>C10AA01</b> | Simvastatin                     | 4730  | 4717  | 0.95 (0.90-1.01) | 1544 | 1504 | 0.89 (0.80-0.99) | 0.94 (0.89-0.99) |
|                | <b>Antithyroid agent</b>        |       |       |                  |      |      |                  |                  |
| <b>H03AA01</b> | Levothyroxine sodium            | 3530  | 3597  | 0.90 (0.83-0.99) | 534  | 556  | 0.92 (0.80-1.07) | 0.91 (0.84-0.98) |
|                | <b>Antidiabetic drug</b>        |       |       |                  |      |      |                  |                  |
| <b>A10BA02</b> | Metformin                       | 2178  | 2362  | 0.86 (0.78-0.94) | 584  | 588  | 0.95 (0.82-1.10) | 0.89 (0.82-0.96) |
|                | <b>Antidepressant</b>           |       |       |                  |      |      |                  |                  |
| <b>N06AB06</b> | Sertraline                      | 928   | 949   | 0.85 (0.73-1.00) | 72   | 80   | 0.71 (0.47-1.09) | 0.83 (0.72-0.96) |
|                | <b>Antiprotozoal drug</b>       |       |       |                  |      |      |                  |                  |
| <b>P01AB01</b> | Metronidazole                   | 132   | 141   | 0.77 (0.58-1.02) | 39   | 43   | 0.55 (0.32-0.92) | 0.72 (0.56-0.92) |

<sup>a</sup> Case-crossover analysis, case period (1 to 7 days) and control period (15 to 21 days) before the index-date for the diagnosis of AMI.

<sup>b</sup> In BOLASSO, the effect of each selected drug is controlled for the effect of other selected drugs. <sup>c</sup> Data from the Swedish Prescribed register, 2005 to 2014

<sup>d</sup> Data from the Norwegian Prescribed Database, 2004 to 2014

<sup>e</sup> Combined estimates of Norwegian and Swedish data calculated using fixed-effect model

<sup>f</sup> Classified according to Anatomical Therapeutic Chemical (ATC), 5<sup>th</sup> level

Supplementary file

| Table S5 Relative risks of acute myocardial infarction within 7 days after the drug was dispensed. Univariable results for drugs selected by BOLASSO approach in both the countries. Sub-group analyses according to age in Norway |                                       |                          |                             |                                   |                          |                             |                                  |
|------------------------------------------------------------------------------------------------------------------------------------------------------------------------------------------------------------------------------------|---------------------------------------|--------------------------|-----------------------------|-----------------------------------|--------------------------|-----------------------------|----------------------------------|
|                                                                                                                                                                                                                                    |                                       |                          |                             | Norway <sup>‡</sup><br>< 80 years |                          |                             | Norway <sup>‡</sup><br>≥80 years |
| ATC Code <sup>s</sup>                                                                                                                                                                                                              | Drug Names                            | Case window (exposed); N | Control window (exposed); N | RR (95% CI)                       | Case window (exposed); N | Control window (exposed); N | RR (95% CI)                      |
|                                                                                                                                                                                                                                    | <b><i>Narcotic analgesics</i></b>     |                          |                             |                                   |                          |                             |                                  |
| N02AG01                                                                                                                                                                                                                            | Morphine & antispasmodics             | NA                       | NA                          | NA                                | 28                       | 2                           | 14.0 (3.33-58.77)                |
| N02AA01                                                                                                                                                                                                                            | Morphine                              | 25                       | 24                          | 1.04 (0.59-1.82)                  | 112                      | 43                          | 2.60 (1.83-3.70)                 |
| N02AA05                                                                                                                                                                                                                            | Oxycodone                             | 135                      | 95                          | 1.42 (1.09-1.85)                  | 117                      | 96                          | 1.22 (0.93-1.60)                 |
| N02AA59                                                                                                                                                                                                                            | Codeine, combinations                 | 759                      | 686                         | 1.11 (1.00-1.23)                  | 627                      | 516                         | 1.22 (1.08-1.37)                 |
| R05FA02                                                                                                                                                                                                                            | Opium derivatives & expectorant       | 34                       | 22                          | 1.55 (0.90-2.64)                  | 37                       | 13                          | 2.85 (1.51-5.35)                 |
|                                                                                                                                                                                                                                    | <b><i>Non-narcotic analgesic</i></b>  |                          |                             |                                   |                          |                             |                                  |
| N02BE01                                                                                                                                                                                                                            | Paracetamol                           | 517                      | 489                         | 1.05 (0.93-1.19)                  | 895                      | 801                         | 1.12 (1.01-1.23)                 |
|                                                                                                                                                                                                                                    | <b><i>Anti-inflammatory drugs</i></b> |                          |                             |                                   |                          |                             |                                  |
| M01AB05                                                                                                                                                                                                                            | Diclofenac                            | 344                      | 299                         | 1.15 (0.99-1.34)                  | 160                      | 88                          | 1.82 (1.40-2.36)                 |
|                                                                                                                                                                                                                                    | <b><i>Antibiotics</i></b>             |                          |                             |                                   |                          |                             |                                  |
| J01FA01                                                                                                                                                                                                                            | Erythromycin                          | 95                       | 45                          | 2.11 (1.48-3.01)                  | 61                       | 44                          | 1.39 (0.94-2.04)                 |
| J01AA02                                                                                                                                                                                                                            | Doxycycline                           | 176                      | 131                         | 1.34 (1.07-1.68)                  | 148                      | 82                          | 1.80 (1.38-2.36)                 |
| J01CA04                                                                                                                                                                                                                            | Amoxicillin                           | 158                      | 84                          | 1.88 (1.44-2.45)                  | 169                      | 84                          | 2.01 (1.55-2.61)                 |
| J01XE01                                                                                                                                                                                                                            | Nitrofurantoin                        | 37                       | 19                          | 1.95 (1.12-3.39)                  | 68                       | 47                          | 1.45 (1.00-2.10)                 |
| J01EA01                                                                                                                                                                                                                            | Trimethoprim                          | 48                       | 38                          | 1.26 (0.83-1.93)                  | 101                      | 76                          | 1.33 (0.99-1.79)                 |
| J01CE02                                                                                                                                                                                                                            | Phenoxymethylpenicillin               | 215                      | 150                         | 1.43 (1.16-1.77)                  | 208                      | 127                         | 1.64 (1.31-2.04)                 |
| J01MA02                                                                                                                                                                                                                            | Ciprofloxacin                         | 86                       | 56                          | 1.54 (1.10-2.15)                  | 108                      | 78                          | 1.38 (1.03-1.85)                 |
| J01CA08                                                                                                                                                                                                                            | Pivmecillinam                         | 101                      | 72                          | 1.40 (1.04-1.90)                  | 208                      | 139                         | 1.50 (1.21-1.85)                 |
|                                                                                                                                                                                                                                    | <b><i>Antiprotozoal drug</i></b>      |                          |                             |                                   |                          |                             |                                  |
| P01AB01                                                                                                                                                                                                                            | Metronidazole                         | 26                       | 29                          | 0.90 (0.53-1.52)                  | 25                       | 22                          | 1.14 (0.64-2.02)                 |
|                                                                                                                                                                                                                                    | <b><i>Antithrombotic agents</i></b>   |                          |                             |                                   |                          |                             |                                  |
| B01AC24                                                                                                                                                                                                                            | Ticagrelor                            | 24                       | 5                           | 4.80 (1.83-12.58)                 | 3                        | 1                           | 3.00 (0.31-28.84)                |
| B01AC04                                                                                                                                                                                                                            | Clopidogrel                           | 216                      | 126                         | 1.71 (1.38-2.14)                  | 175                      | 125                         | 1.40 (1.11-1.76)                 |
| B01AB05                                                                                                                                                                                                                            | Enoxaparin                            | 41                       | 15                          | 2.73 (1.51-4.94)                  | 37                       | 28                          | 1.32 (0.81-2.16)                 |
| B01AC06                                                                                                                                                                                                                            | Acetylsalicylic acid                  | 1448                     | 1185                        | 1.22 (1.13-1.32)                  | 1693                     | 1618                        | 1.05 (0.98-1.12)                 |
|                                                                                                                                                                                                                                    | <b><i>Antiadrenergic agents</i></b>   |                          |                             |                                   |                          |                             |                                  |
| R03AC03                                                                                                                                                                                                                            | Terbutaline                           | 57                       | 43                          | 1.33 (0.89-1.97)                  | 35                       | 34                          | 1.03 (0.64-1.65)                 |
| R03AC02                                                                                                                                                                                                                            | Salbutamol                            | 343                      | 281                         | 1.22 (1.04-1.43)                  | 310                      | 251                         | 1.24 (1.05-1.46)                 |

## Supplementary file

|         |                                           |      |     |                  |      |      |                  |
|---------|-------------------------------------------|------|-----|------------------|------|------|------------------|
|         | <b><i>Proton pump inhibitors</i></b>      |      |     |                  |      |      |                  |
| A02BC05 | Esomeprazol                               | 305  | 307 | 0.99 (0.85-1.16) | 420  | 281  | 1.49 (1.29-1.74) |
| A02BC01 | Omeprazole                                | 108  | 98  | 1.10 (0.84-1.45) | 130  | 115  | 1.13 (0.88-1.45) |
|         | <b><i>Vasodilator</i></b>                 |      |     |                  |      |      |                  |
| C01DA02 | Glyceral trinitrate                       | 992  | 390 | 2.54 (2.26-2.86) | 766  | 474  | 1.62 (1.44-1.81) |
|         | <b><i>Prokinetic drug</i></b>             |      |     |                  |      |      |                  |
| A03FA01 | Metoclopramide                            | 132  | 98  | 1.35 (1.04-1.75) | 203  | 122  | 1.66 (1.33-2.08) |
|         | <b><i>Expectorants</i></b>                |      |     |                  |      |      |                  |
| R05CB01 | Acetylcysteine                            | 204  | 175 | 1.17 (0.95-1.43) | 315  | 219  | 1.44 (1.21-1.71) |
|         | <b><i>Anxiolytics</i></b>                 |      |     |                  |      |      |                  |
| N05BA01 | Diazepam                                  | 334  | 325 | 1.03 (0.88-1.20) | 330  | 250  | 1.32 (1.12-1.56) |
|         | <b><i>Angiotension II antagonists</i></b> |      |     |                  |      |      |                  |
| C09CA01 | Losartan                                  | 147  | 139 | 1.06 (0.84-1.33) | 145  | 171  | 0.85 (0.68-1.06) |
| C09CA06 | Candesartan                               | 180  | 193 | 0.93 (0.76-1.14) | 180  | 194  | 0.93 (0.76-1.14) |
|         | <b><i>Antidepressants</i></b>             |      |     |                  |      |      |                  |
| N06AB04 | Citalopram                                | 63   | 56  | 1.13 (0.78-1.61) | 107  | 126  | 0.85 (0.66-1.10) |
| N06AB06 | Sertraline                                | 30   | 34  | 0.68 (0.43-1.08) | 60   | 54   | 1.11 (0.77-1.60) |
|         | <b><i>ACE inhibitors</i></b>              |      |     |                  |      |      |                  |
| C09AA05 | Ramipril                                  | 275  | 237 | 1.16 (0.98-1.38) | 434  | 446  | 0.97 (0.85-1.11) |
|         | <b><i>Antigout agent</i></b>              |      |     |                  |      |      |                  |
| M04AA01 | Allopurinol                               | 109  | 137 | 0.80 (0.62-1.02) | 242  | 257  | 0.94 (0.79-1.12) |
|         | <b><i>Antidiabetic agent</i></b>          |      |     |                  |      |      |                  |
| A10BA02 | Metformin                                 | 361  | 367 | 0.98 (0.85-1.14) | 332  | 328  | 1.01 (0.87-1.18) |
|         | <b><i>Beta-blocking agents</i></b>        |      |     |                  |      |      |                  |
| C07AB02 | Metoprolol                                | 1101 | 925 | 1.19 (1.09-1.30) | 1478 | 1364 | 1.09 (1.01-1.17) |
| C07AB03 | Atenolol                                  | 96   | 111 | 0.86 (0.66-1.14) | 156  | 174  | 0.90 (0.72-1.11) |
|         | <b><i>Calcium-channel blockers</i></b>    |      |     |                  |      |      |                  |
| C08CA01 | Amlodipine                                | 329  | 331 | 0.99 (0.85-1.16) | 377  | 387  | 0.97 (0.85-1.12) |
| C08CA02 | Felodipine                                | 58   | 38  | 1.53 (1.01-2.29) | 54   | 55   | 0.98 (0.67-1.43) |
|         | <b><i>Decongestants</i></b>               |      |     |                  |      |      |                  |
| R01AD09 | Mometasone                                | 62   | 72  | 0.86 (0.61-1.21) | 21   | 28   | 0.75 (0.43-1.32) |
|         | <b><i>Diuretics</i></b>                   |      |     |                  |      |      |                  |
| C03CA01 | Furosemide                                | 317  | 301 | 1.05 (0.90-1.23) | 1000 | 900  | 1.11 (1.02-1.22) |
| C03DA01 | Spironolactone                            | 72   | 66  | 1.09 (0.78-1.52) | 186  | 153  | 1.22 (0.98-1.51) |
|         | <b><i>Glucocorticoids</i></b>             |      |     |                  |      |      |                  |
| H02AB06 | Prednisolone                              | 438  | 362 | 1.21 (1.05-1.39) | 525  | 461  | 1.14 (1.00-1.29) |



## Supplementary file

|                |                                       |     |     |                  |      |     |                  |
|----------------|---------------------------------------|-----|-----|------------------|------|-----|------------------|
|                | <b><i>Hypnotics and sedatives</i></b> |     |     |                  |      |     |                  |
| <b>N05CF01</b> | Zopiclone                             | 608 | 568 | 1.07 (0.95-1.20) | 1010 | 892 | 1.13 (1.03-1.24) |
| <b>N05CF02</b> | Zolpidem                              | 76  | 77  | 0.99 (0.72-1.36) | 608  | 568 | 1.07 (0.95-1.20) |
|                | <b><i>Lipid modifying agent</i></b>   |     |     |                  |      |     |                  |
| <b>C10AA01</b> | Simvastatin                           | 903 | 846 | 1.07 (0.97-1.17) | 903  | 902 | 1.00 (0.91-1.10) |
|                | <b><i>Antithyroid agent</i></b>       |     |     |                  |      |     |                  |
| <b>H03AA01</b> | Levothyroxine sodium                  | 230 | 257 | 0.89 (0.75-1.07) | 399  | 391 | 1.02 (0.89-1.17) |
|                | <b><i>Antianemic agent</i></b>        |     |     |                  |      |     |                  |
| <b>B03BA03</b> | Hydroxocobalamin                      | 20  | 18  | 1.11 (0.59-2.10) | 29   | 45  | 0.64 (0.40-1.03) |

NA= Not Available

\* Case crossover analysis, case period (1 to 7 days) and control period (15 to 21 days) before the index-date for the diagnosis of first AMI.

† In BOLASSO, the effect of each selected drugs is controlled for the effect of other selected drugs.

‡ Data from the Norwegian Prescribed Database, 2004 to 2014

§ Classified according to Anatomical Therapeutic Chemical (ATC), 5<sup>th</sup> level

**Table S6 Relative risks of acute myocardial infarction within 7 days after the drug was dispensed. Univariable results for drugs selected by BOLASSO approach in both the countries. Sub-group analyses according to age in Sweden**

|  |  |  |  |                     |  |  |                     |
|--|--|--|--|---------------------|--|--|---------------------|
|  |  |  |  | Sweden <sup>‡</sup> |  |  | Sweden <sup>‡</sup> |
|--|--|--|--|---------------------|--|--|---------------------|

Supplementary file

|                       |                                       |                          |                             | <80 years         |                          |                             | ≥80 years         |
|-----------------------|---------------------------------------|--------------------------|-----------------------------|-------------------|--------------------------|-----------------------------|-------------------|
| ATC Code <sup>s</sup> | Drug Names                            | Case window (exposed); N | Control window (exposed); N | RR (95% CI)       | Case window (exposed); N | Control window (exposed); N | RR (95% CI)       |
|                       | <b><i>Narcotic analgesics</i></b>     |                          |                             |                   |                          |                             |                   |
| N02AG01               | Morphine & antispasmodics             | 71                       | 23                          | 3.09 (1.93-4.94)  | 185                      | 19                          | 9.73 (6.07-15.61) |
| N02AA01               | Morphine                              | 665                      | 537                         | 1.23 (1.11-1.39)  | 1530                     | 978                         | 1.56 (1.44-1.70)  |
| N02AA05               | Oxycodone                             | 1024                     | 891                         | 1.15 (1.05-1.26)  | 1635                     | 1446                        | 1.13 (1.05-1.23)  |
| N02AA59               | Codeine, combinations                 | 929                      | 873                         | 1.06 (0.97-1.16)  | 597                      | 518                         | 1.16 (1.02-1.30)  |
| R05FA02               | Opium derivatives & expectorant       | 527                      | 313                         | 1.68 (1.46-1.94)  | 301                      | 125                         | 2.40 (1.95-2.97)  |
|                       | <b><i>Non-narcotic analgesic</i></b>  |                          |                             |                   |                          |                             |                   |
| N02BE01               | Paracetamol                           | 4336                     | 4304                        | 1.01 (0.97-1.05)  | 10145                    | 9732                        | 1.04 (1.01-1.07)  |
|                       | <b><i>Anti-inflammatory drugs</i></b> |                          |                             |                   |                          |                             |                   |
| M01AB05               | Diclofenac                            | 838                      | 968                         | 1.20 (1.09-1.33)  | 342                      | 303                         | 1.12 (0.97-1.32)  |
|                       | <b><i>Antibiotics</i></b>             |                          |                             |                   |                          |                             |                   |
| J01FA01               | Erythromycin                          | 66                       | 24                          | 2.75 (1.72-4.39)  | 24                       | 12                          | 2.00 (1.00-3.99)  |
| J01AA02               | Doxycycline                           | 648                      | 390                         | 1.66 (1.47-1.88)  | 447                      | 201                         | 2.22 (1.88-2.63)  |
| J01CA04               | Amoxicillin                           | 325                      | 226                         | 1.44 (1.21-1.70)  | 250                      | 127                         | 1.97 (1.59-2.44)  |
| J01XE01               | Nitrofurantoin                        | 131                      | 109                         | 1.20 (0.93-1.55)  | 234                      | 140                         | 1.67 (1.36-2.06)  |
| J01EA01               | Trimethoprim                          | 122                      | 85                          | 1.44 (1.09-1.89)  | 280                      | 196                         | 1.43 (1.19-1.71)  |
| J01CE02               | Phenoxymethylpenicillin               | 437                      | 369                         | 1.18 (1.03-1.36)  | 410                      | 226                         | 1.81 (1.54-2.13)  |
| J01MA02               | Ciprofloxacin                         | 419                      | 319                         | 1.31 (1.14-1.52)  | 411                      | 311                         | 1.32 (1.14-1.53)  |
| J01CA08               | Pivmecillinam                         | 159                      | 137                         | 1.16 (0.92-1.46)  | 376                      | 285                         | 1.31 (1.13-1.54)  |
|                       | <b><i>Antiprotozoal drug</i></b>      |                          |                             |                   |                          |                             |                   |
| P01AB01               | Metronidazole                         | 75                       | 93                          | 0.81 (0.59-1.09)  | 94                       | 92                          | 1.02 (0.77-1.36)  |
|                       | <b><i>Antithrombotic agents</i></b>   |                          |                             |                   |                          |                             |                   |
| B01AC24               | Ticagrelor                            | 81                       | 11                          | 7.36 (3.92-13.82) | 15                       | 3                           | 5.00 (1.44-17.27) |
| B01AC04               | Clopidogrel                           | 704                      | 391                         | 1.80 (1.59-2.04)  | 586                      | 461                         | 1.27 (1.13-1.44)  |
| B01AB05               | Enoxaparin                            | 58                       | 53                          | 1.09 (0.75-1.59)  | 68                       | 40                          | 1.70 (1.15-2.51)  |

## Supplementary file

|                |                                           |      |      |                  |        |        |                  |
|----------------|-------------------------------------------|------|------|------------------|--------|--------|------------------|
| <b>B01AC06</b> | Acetylsalicylic acid                      | 4956 | 4746 | 1.04 (1.00-1.09) | 10,533 | 10,494 | 1.00 (0.98-1.03) |
|                | <b><i>Antiadrenergic agents</i></b>       |      |      |                  |        |        |                  |
| <b>R03AC03</b> | Terbutaline                               | 645  | 533  | 1.21 (1.08-1.36) | 323    | 254    | 1.27 (1.08-1.50) |
| <b>R03AC02</b> | Salbutamol                                | 418  | 346  | 1.21 (1.05-1.39) | 200    | 180    | 1.11 (0.91-1.36) |
|                | <b><i>Proton pump inhibitors</i></b>      |      |      |                  |        |        |                  |
| <b>A02BC05</b> | Esomeprazol                               | 472  | 430  | 1.10 (0.96-1.25) | 399    | 372    | 1.07 (0.93-1.24) |
| <b>A02BC01</b> | Omeprazole                                | 3328 | 3012 | 1.10 (1.05-1.16) | 5542   | 5249   | 1.06 (1.02-1.10) |
|                | <b><i>Vasodilator</i></b>                 |      |      |                  |        |        |                  |
| <b>C01DA02</b> | Glyceral trinitrate                       | 2760 | 1456 | 1.90 (1.78-2.02) | 2260   | 1493   | 1.51 (1.42-1.62) |
|                | <b><i>Prokinetic drug</i></b>             |      |      |                  |        |        |                  |
| <b>A03FA01</b> | Metoclopramide                            | 310  | 248  | 1.25 (1.06-1.48) | 399    | 255    | 1.56 (1.34-1.83) |
|                | <b><i>Expectorants</i></b>                |      |      |                  |        |        |                  |
| <b>R05CB01</b> | Acetylcysteine                            | 828  | 649  | 1.28 (1.15-1.41) | 849    | 726    | 1.17 (1.06-1.29) |
|                | <b><i>Anxiolytics</i></b>                 |      |      |                  |        |        |                  |
| <b>N05BA01</b> | Diazepam                                  | 669  | 596  | 1.12 (1.01-1.25) | 496    | 361    | 1.37 (1.20-1.57) |
|                | <b><i>Angiotension II antagonists</i></b> |      |      |                  |        |        |                  |
| <b>C09CA01</b> | Losartan                                  | 772  | 767  | 1.01 (0.91-1.11) | 956    | 971    | 0.98 (0.90-1.08) |
| <b>C09CA06</b> | Candesartan                               | 648  | 684  | 0.95 (0.85-1.05) | 715    | 764    | 0.94 (0.85-1.04) |
|                | <b><i>Antidepressants</i></b>             |      |      |                  |        |        |                  |
| <b>N06AB04</b> | Citalopram                                | 1439 | 1475 | 0.98 (0.91-1.05) | 4109   | 4038   | 1.02 (0.97-1.05) |
| <b>N06AB06</b> | Sertraline                                | 498  | 533  | 0.93 (0.83-1.06) | 860    | 827    | 1.04 (0.95-1.14) |
|                | <b><i>ACE inhibitors</i></b>              |      |      |                  |        |        |                  |
| <b>C09AA05</b> | Ramipril                                  | 738  | 726  | 1.01 (0.92-1.13) | 1132   | 1129   | 1.00 (0.92-1.09) |
|                | <b><i>Antigout agent</i></b>              |      |      |                  |        |        |                  |
| <b>M04AA01</b> | Allopurinol                               | 597  | 651  | 0.92 (0.82-1.02) | 1300   | 1301   | 0.99 (0.93-1.08) |
|                | <b><i>Antidiabetic agent</i></b>          |      |      |                  |        |        |                  |
| <b>A10BA02</b> | Metformin                                 | 1501 | 1694 | 0.89 (0.83-1.04) | 1158   | 1202   | 0.96 (0.89-1.04) |
|                | <b><i>Beta-blocking agents</i></b>        |      |      |                  |        |        |                  |

## Supplementary file

|                |                                 |      |      |                  |       |       |                  |
|----------------|---------------------------------|------|------|------------------|-------|-------|------------------|
| <b>C07AB02</b> | Metoprolol                      | 3324 | 3074 | 1.08 (1.03-1.14) | 5537  | 5363  | 1.03 (0.99-1.07) |
| <b>C07AB03</b> | Atenolol                        | 1092 | 1090 | 1.00 (0.92-1.09) | 1744  | 1733  | 1.01 (0.94-1.08) |
|                | <b>Calcium-channel blockers</b> |      |      |                  |       |       |                  |
| <b>C08CA01</b> | Amlodipine                      | 1163 | 1162 | 1.00 (0.92-1.09) | 1349  | 1382  | 0.98 (0.91-1.05) |
| <b>C08CA02</b> | Felodipine                      | 1382 | 1380 | 1.00 (0.93-1.08) | 2147  | 2237  | 0.96 (0.90-1.02) |
|                | <b>Decongestants</b>            |      |      |                  |       |       |                  |
| <b>R01AD09</b> | Mometasone                      | 245  | 252  | 0.97 (0.82-1.16) | 81    | 86    | 0.94 (0.70-1.28) |
|                | <b>Diuretics</b>                |      |      |                  |       |       |                  |
| <b>C03CA01</b> | Furosemide                      | 3329 | 3312 | 1.01 (0.96-1.05) | 10978 | 10495 | 1.05 (1.02-1.07) |
| <b>C03DA01</b> | Spironolactone                  | 743  | 761  | 0.98 (0.88-1.08) | 1973  | 1913  | 1.03 (0.97-1.10) |
|                | <b>Glucocorticoids</b>          |      |      |                  |       |       |                  |
| <b>H02AB06</b> | Prednisolone                    | 1330 | 1184 | 1.12 (1.04-1.21) | 2362  | 2302  | 1.03 (0.97-1.09) |
|                | <b>Hypnotics and sedatives</b>  |      |      |                  |       |       |                  |
| <b>N05CF01</b> | Zopiclone                       | 1898 | 1938 | 0.98 (0.92-1.04) | 4101  | 4086  | 1.00 (0.96-1.05) |
| <b>N05CF02</b> | Zolpidem                        | 932  | 980  | 0.95 (0.87-1.04) | 1623  | 1584  | 1.02 (0.96-1.10) |
|                | <b>Lipid modifying agent</b>    |      |      |                  |       |       |                  |
| <b>C10AA01</b> | Simvastatin                     | 3239 | 3233 | 1.00 (0.95-1.05) | 2372  | 2439  | 0.97 (0.92-1.03) |
|                | <b>Antithyroid agent</b>        |      |      |                  |       |       |                  |
| <b>H03AA01</b> | Levothyroxine sodium            | 1326 | 1351 | 0.98 (0.91-1.06) | 3517  | 3512  | 1.00 (0.96-1.05) |
|                | <b>Antianemic agent</b>         |      |      |                  |       |       |                  |
| <b>B03BA03</b> | Hydroxocobalamin                | 34   | 66   | 0.52 (0.34-0.78) | 91    | 89    | 1.02 (0.76-1.37) |

\* Case crossover analysis, case period (1 to 7 days) and control period (15 to 21 days) before the index-date for the diagnosis of first AMI.

† In BOLASSO, the effect of each selected drugs is controlled for the effect of other selected drugs.

‡ Data from the Swedish Prescribed Drug Register, 2005 to 2014

§ Classified according to Anatomical Therapeutic Chemical (ATC), 5<sup>th</sup> level

## Appendix A

# The case-crossover design

### A.1 The likelihood function under the case-crossover design

In our analysis, the subjects are the patients who experienced the event (case), and each patient is both the case and the control of itself, in different time periods. For the whole analysis, we used one case and one control window for each patient. According to [6], our design is called a non-localizable design and, more specifically, an unidirectional design, because the windows are placed after observing the event for each patient and not a priori.

Assume that we have a total of  $N$  individuals who experienced the event at some point in the time set  $\{1, \dots, T\}$ . Here,  $T$  is the length of the observation period, and the  $t \in \{1, \dots, T\}$  are the discrete time points where each case was checked (followed up). Let  $Y_{it}$  be the risk occurrence indicator for subject  $i$  at time  $t$ , that is  $Y_{it} = 1$  if the event took place at time  $t$  and  $Y_{it} = 0$  otherwise. For  $i = 1, \dots, N$  and  $t = 1, \dots, T$ , let  $X_{it} = (X_{it1}, \dots, X_{itp})$  be the  $p$ -dimensional vector of exposures at time  $t$  for the  $i$ th subject. Let further  $X_i = (X_{it}; t = 1, \dots, T)$  be the corresponding  $p$ -dimensional exposure time series vector.

Then, if it is assumed that events follow a proportional hazards model, and if it is assumed that events are rare, we will assume that

$$P(Y_{it} = 1 | X_i) = \lambda_{0it} e^{X_{it}\beta}, \quad (1)$$

where  $\beta = (\beta_1, \dots, \beta_p)'$  is a vector of coefficients. The baseline function  $\lambda_{0it}$  is assumed to vary among subjects, carrying characteristics of the  $i$ th subject like, for example, age, or other characteristics which may change with time  $t$ . In other words, Eq. (1) is the probability that the  $i$ th subject will experience the event exactly at time  $t$ , given its exposure vector and characteristics.

Assume first that the exposure of each subject is observed throughout the time set  $\{1, 2, \dots, T\}$ . Then by conditioning on the occurrence of exactly one event in  $\{1, 2, \dots, T\}$ , and as above assuming that events are rare, the contribution to the likelihood from the  $i$ th subject would be ([8, 6]):

$$\begin{aligned} & P\left(Y_{i,t_i} = 1 \mid \sum_{s=1}^T Y_{is} = 1, X_i\right) \\ &= \frac{P(Y_{i,t_i} = 1 | X_i)}{P\left(\sum_{s=1}^T Y_{is} = 1 | X_i\right)} \\ &= \frac{P(Y_{i,t_i} = 1 | X_i)}{\sum_{s=1}^T P(Y_{is} = 1 | X_i)} \end{aligned}$$

$$= \frac{\lambda_{0it_i} e^{X_{it_i}\beta}}{\sum_{s=1}^T \lambda_{0is} e^{X_{is}\beta}} \quad (2)$$

The complete likelihood is then the product of these contributions, namely

$$L(\beta) = \prod_{i=1}^N \frac{\lambda_{0it_i} e^{X_{it_i}\beta}}{\sum_{s=1}^T \lambda_{0is} e^{X_{is}\beta}}. \quad (3)$$

Since we do not know the exposure  $X_{it}$  for all  $t \in 1, 2, \dots, T$ , but only in a referent window  $W_i$ , following Lumley and Levy [8], we replace the denominators in Eq. (3) by the simplification where  $s$  runs only in the referent window. Thus, we replace Eq. (3) by

$$L(\beta) = \prod_{i=1}^N \frac{\lambda_{0it_i} e^{X_{it_i}\beta}}{\sum_{t \in W_i} \lambda_{0it} e^{X_{it}\beta}} = \prod_{i=1}^N \frac{e^{X_{it_i}\beta}}{\sum_{t \in W_i} e^{X_{it}\beta}} = \prod_{i=1}^N \frac{e^{X_{it_i}\beta}}{e^{X_{it_i}\beta} + e^{X_{is_i}\beta}}. \quad (4)$$

In our application,  $W_i = \{t_i, s_i\}$ , where  $t_i$  and  $s_i$  are the case and the control windows of the  $i$ th subject, respectively. Furthermore, the  $\lambda_{0it_i}$  and  $\lambda_{0it}$  are cancelled because they are assumed to be (approximately) constant in the referent windows. Now,  $X_{it_i}$  is a vector of length  $p$  corresponding to the exposure of each drug in the case window, while  $X_{is_i}$  is a vector of the same length corresponding to the exposures in the control window. Both vectors contain the values 0 and 1 for non-exposure and exposure, respectively.

It should be noted that Eq. (4) is not an actual likelihood because of the reduction of the sum in the denominator of (3). Thus, as noted by Lumley and Levy [8], the resulting estimates may be biased. This bias, called overlap bias, will however usually be small (see [8]).

On the other hand, Eq. (4) has the form of the likelihood of a conditional logistic regression (CLR) and can hence be analyzed using standard statistical packages allowing CLR. Note that the window  $W_i$  in Eq. (4) consists of two time points,  $t_i$  (case) and  $s_i$  (control), while more controls can be included by adding points in the window.

## A.2 Generalized linear model

Our model can be represented differently in order to show that it is a generalized linear model of logistic type. Consider the matrices  $X_t = (X_{1t_1}, \dots, X_{Nt_N})^T$ , corresponding to the case windows, and  $X_s = (X_{1s_1}, \dots, X_{Ns_N})^T$ , corresponding to the control windows, both of dimension  $N \times p$ , where  $X_{it_i}$  and  $X_{is_i}$  are defined above. Consider also the corresponding response vectors  $Y_t = (Y_{1t_1}, \dots, Y_{Nt_N})^T$  and  $Y_s = (Y_{1s_1}, \dots, Y_{Ns_N})^T$ , for the cases and controls, respectively. These are both  $N$ -dimensional, where the response vector for the cases contains only the element 1 and the response vector for the controls contains only the element 0. This is because we restrict attention to patients with exactly one event in the

given time set. The likelihood  $L(\beta)$  can hence be written in the form

$$L(\beta) = \prod_{i=1}^N \frac{e^{X_{it_i}\beta}}{e^{X_{it_i}\beta} + e^{X_{is_i}\beta}} = \prod_{i=1}^N \frac{1}{1 + e^{-X_i\beta}}, \quad (5)$$

where  $X_i = X_{it_i} - X_{is_i}$ , that is, we subtract the control vector from the case vector for each patient. As will be seen below, for a case-crossover design with one case and one control window, the likelihood can be written in the form of the unconditional likelihood for a binary logistic regression with no intercept and constant response equal to one (see Avalos et al.[3]). The fact that the response is constant and equal to one, becomes more clear when we subtract the response vector  $Y_s$  from  $Y_t$ . Note that now the data matrix  $X$  consists of values  $-1, 0, 1$ . Furthermore, for a specific component  $\beta_j$  of the vector  $\beta$ ,  $e^{\beta_j}$  is the relative risk for the event, if the  $j$ th component of  $X_i$  is increased by 1, which means that the corresponding medicine is taken in the case window and not in the control window.

By letting  $p_i$  be the contribution of the  $i$ th individual to the likelihood in Eq. (5), that is  $p_i = \frac{1}{1+e^{-X_i\beta}} = \frac{e^{X_i\beta}}{1+e^{X_i\beta}}$ , then the likelihood can be written in the following form:

$$L(\beta) = \prod_{i=1}^N \frac{1}{1 + e^{-X_i\beta}} = \prod_{i=1}^N p_i = \prod_{i=1}^N p_i^{y_i} (1 - p_i)^{1-y_i}, \quad (6)$$

since  $y_i = 1$  for all  $i$ . The log-likelihood is of the form

$$\begin{aligned} \ell(\beta) &= \log(L(\beta)) = \sum_{i=1}^N \log [p_i^{y_i} (1 - p_i)^{1-y_i}] \\ &= \sum_{i=1}^N [y_i \log(p_i) + (1 - y_i) \log(1 - p_i)] \\ &= \sum_{i=1}^N [y_i \text{logit}(p_i) + \log(1 - p_i)], \end{aligned} \quad (7)$$

which corresponds to the likelihood of logistic regression ([9, 10])

Finally, the log-likelihood function given in Eq. (7) is a concave function with respect to the  $\beta$  coefficients. This can easily be seen by rewriting the function in the following form,

$$\begin{aligned} \ell(\beta) &= \sum_{i=1}^N [y_i \text{logit}(p_i) + \log(1 - p_i)] \\ &= \sum_{i=1}^N \left( y_i X_i \beta + \log \left( \frac{1}{1 + e^{X_i \beta}} \right) \right) \\ &= \sum_{i=1}^N \left( y_i X_i \beta - \log \left( 1 + e^{X_i \beta} \right) \right) \end{aligned}$$

and noting that  $-\log(1 + e^x)$  is a concave function.

### A.3 The lasso method and glmnet

In this section we describe how we estimated the coefficients in  $\beta$  using the lasso (the least absolute shrinkage and selection operator) method ([11]). More specifically, we estimated the coefficients under the lasso penalty by minimizing the negative penalized log-likelihood in Eq. (7), that is,

$$\hat{\beta}(\lambda) = \operatorname{argmin}_{\beta} \left( -\ell(\beta) + \lambda \sum_j |\beta_j| \right).$$

The estimation was done via a coordinate descent algorithm using the glmnet package ([5]) in the statistical package R. We chose the binomial family with logit link function in the settings of the glmnet function. Furthermore, the choice of  $\lambda$  was done by generating a sequence of 100  $\lambda$  values and then choosing the best, using 10-fold cross-validation. All of those functions are provided by the package.

The glmnet function for the binomial model requires a two-level response. In our case we have, however, a constant response equal to one. To overcome this problem and allow the use the glmnet function, we added  $N$  rows of zeros to the data matrix  $X$ , and  $N$  new observations to the response vector  $Y$ , all with the value zero. We demonstrate below that this does not change the likelihood function, and since the response vector now contains both zeros and ones, the estimation of  $\beta$  can be done using the glmnet function,

To see why the above claim is true, let  $j$  correspond to lines of the extended data matrix  $X$  which were added, while  $i$  corresponds to lines of the original data matrix. Then  $p_j = 1/(1 + e^0) = 1/2$ , while  $p_i = \frac{1}{1 + e^{-X_i\beta}}$ , as before. Hence the likelihood in Eq. (6), using the extended data matrix, becomes

$$L(\beta) = \prod_{j=1}^N p_j^{y_j} (1-p_j)^{1-y_j} \prod_{i=1}^N p_i^{y_i} (1-p_i)^{1-y_i} = \prod_{j=1}^N (1-p_j) \prod_{i=1}^N p_i = (1/2)^N \prod_{i=1}^N p_i, \quad (8)$$

which equals the original likelihood in Eq. (6) multiplied by a constant independent of the parameters. Hence, the estimated coefficients are not affected by the modification. We chose  $N$  additional observations with zero response because, as we will discuss in Appendix A.4, we use bootstrapping to sample from the data matrix  $X$ . We found that  $N$  extra observations are enough to ensure both 0 and 1 responses in each bootstrap sample. If we alternatively added, say, only one extra observation, we would most probably get some bootstrap samples with only 1 as a response, and thus the glmnet function would not work. However, as already noted, the actual number of extra observations with zero response does generally not affect the estimated coefficients.

### A.4 Bolasso

Lasso sometimes allows a few irrelevant variables to enter the model ([3]). Further, according to Tibshirani [11], the standard errors for the lasso estimates



are difficult to acquire. Those problems can be reduced by bootstrapping. Tibshirani [11], Avalos et al. [3] and Avalos et al. [2] suggested a bootstrap version of lasso which is called bolasso, which reduces the uncertainties of the lasso estimates. Bolasso runs a bootstrap on many samples, and estimates the parameters for each sample, using the lasso approach.

In our analysis we ran a bootstrap on the lasso model described in Section A.3, using 1000 bootstrap samples. For each bootstrap sample, a new  $\lambda$  sequence was generated by the glmnet package and the optimal  $\lambda$  was chosen using 10-fold cross validation. Then the model was fitted by glmnet using the current bootstrap sample.

The  $\beta$ -coefficients frequently selected by the lasso from the bootstrap samples are taken into account, while the others are set to zero [3]. Avalos et al. [3] suggested using Akaike's information criterion ([1]),  $AIC = -2\ell(\hat{\beta}) + 2k$ , for estimating the frequency threshold of bolasso. Here  $\ell(\hat{\beta})$  is the log-likelihood function applied on the estimated coefficients from each model under selection, and  $k$  is the total number of non-zero elements in the  $\beta$  vector.  $AIC$  corresponds to an estimation of the allowed number of times that a coefficient could have been set to zero among the bootstraps. We can compute the  $AIC$  for different models and then choose the model which gives the lowest  $AIC$ -value.

The output from the bolasso in our analysis is a matrix of dimension  $p \times B$ . Each column of the matrix corresponds to one bootstrap replicate, that is, the estimated vector of coefficients from that bootstrap sample. Each row of the matrix corresponds to the values that the specific coefficient took among the bootstrap samples. For each row in the matrix, we computed the total number of zeros and we created a frequency vector of length  $p$ . For each value in the frequency vector we created a model by checking which of the coefficients had been set to zero less times than the chosen threshold. For those, their mean among the bootstraps was taken as an estimate, that is

$$\hat{\beta}_j = \sum_{b=1}^B \beta_j^{*b} / B,$$

where  $\beta_j^{*b}$  is the  $b$ -th bootstrap estimate of coefficient  $\beta_j$  and  $B$  is the total number of bootstrap replicates ([4]). The other coefficients are simply set to zero. Next, the  $AIC$  was computed for the corresponding model, where  $k$  is the number of non-zero estimates in the newly computed  $\beta$  vector. Finally, this is done for all thresholds in the sequence and the one which gives the lowest  $AIC$  is chosen as optimal. For that optimal threshold we again check which of the coefficients have been set to zero less times than the optimal threshold and we compute  $\hat{\beta}_j$  as before, while the others are set to zero. This vector of coefficients is the bolasso estimate of the coefficients for the objective function ([3]).

Finally, we can compute the standard error of each coefficient as

$$S\hat{D}_j = \left( \sum_{b=1}^B (\beta_j^{*b} - \hat{\beta}_j)^2 / (B - 1) \right)^{1/2},$$

as well as 95% confidence intervals based on the central limit theorem ( $\hat{\beta}_j - 1.96S\hat{D}_j, \hat{\beta}_j + 1.96S\hat{D}_j$ ) ([4]). However, according to Lockhart et al. [7], con-

fidence intervals obtained by the bootstrap estimates are not optimal for the lasso.

## References

- [1] Hirotugu Akaike. *Selected Papers of Hirotugu Akaike*, chapter Information Theory and an Extension of the Maximum Likelihood Principle, pages 199–213. Springer New York, New York, NY, 1998.
- [2] Marta Avalos, Yves Grandvalet, Nuria Duran Adroher, Ludivine Orriols, and Emmanuel Lagarde. Analysis of multiple exposures in the case-crossover design via sparse conditional likelihood. *Stat Med*, 2012.
- [3] Marta Avalos, Ludivine Orriols, Helene Pouyes, Yves Grandvalet, Frantz Thiessard, and Emmanuel Lagarde. Variable selection on large case-crossover data: application to a registry-based study of prescription drugs and road traffic crashes. *Pharmacoepidemiol Drug Saf*, 2013.
- [4] B. Efron and R.J. Tibshirani. *An Introduction to the Bootstrap*. Chapman & Hall/CRC Monographs on Statistics & Applied Probability. Taylor & Francis, 1994.
- [5] Jerome H. Friedman, Trevor Hastie, and Rob Tibshirani. Regularization paths for generalized linear models via coordinate descent. *Journal of Statistical Software*, 33(1):1–22, 2 2010.
- [6] Holly Janes, Lianne Sheppard, and Thomas Lumley. Overlap bias in the case-crossover design, with application to air pollution exposures. *Statistics in Medicine*, 24(2):285–300, 2005.
- [7] Richard Lockhart, Jonathan Taylor, Ryan J. Tibshirani, and Robert Tibshirani. A significance test for the lasso. 2013.
- [8] Thomas Lumley and Drew Levy. Bias in the case – crossover design: implications for studies of air pollution. *Environmetrics*, 11(6):689–704, 2000.
- [9] J.M. Marin and C. Robert. *Bayesian Core: A Practical Approach to Computational Bayesian Statistics*. Springer Texts in Statistics. Springer, 2007.
- [10] G. Rodríguez. Lecture notes on generalized linear models. 2007.
- [11] Robert Tibshirani. Regression shrinkage and selection via the lasso. *Journal of the Royal Statistical Society, Series B*, 58:267–288, 1994.
